# Supplementary material for: The Synergistic Effect of Chemical Carcinogens Enhances Epstein-Barr Virus Reactivation and Tumor Progression of Nasopharyngeal Carcinoma Cells
Source: PLOS journal article supplement (doi:10.1371/journal.pone.0044810), 2012-09-14
Supplement: S1 (10.1371/journal.pone.0044810.s001) [file journal.pone.0044810.s001]

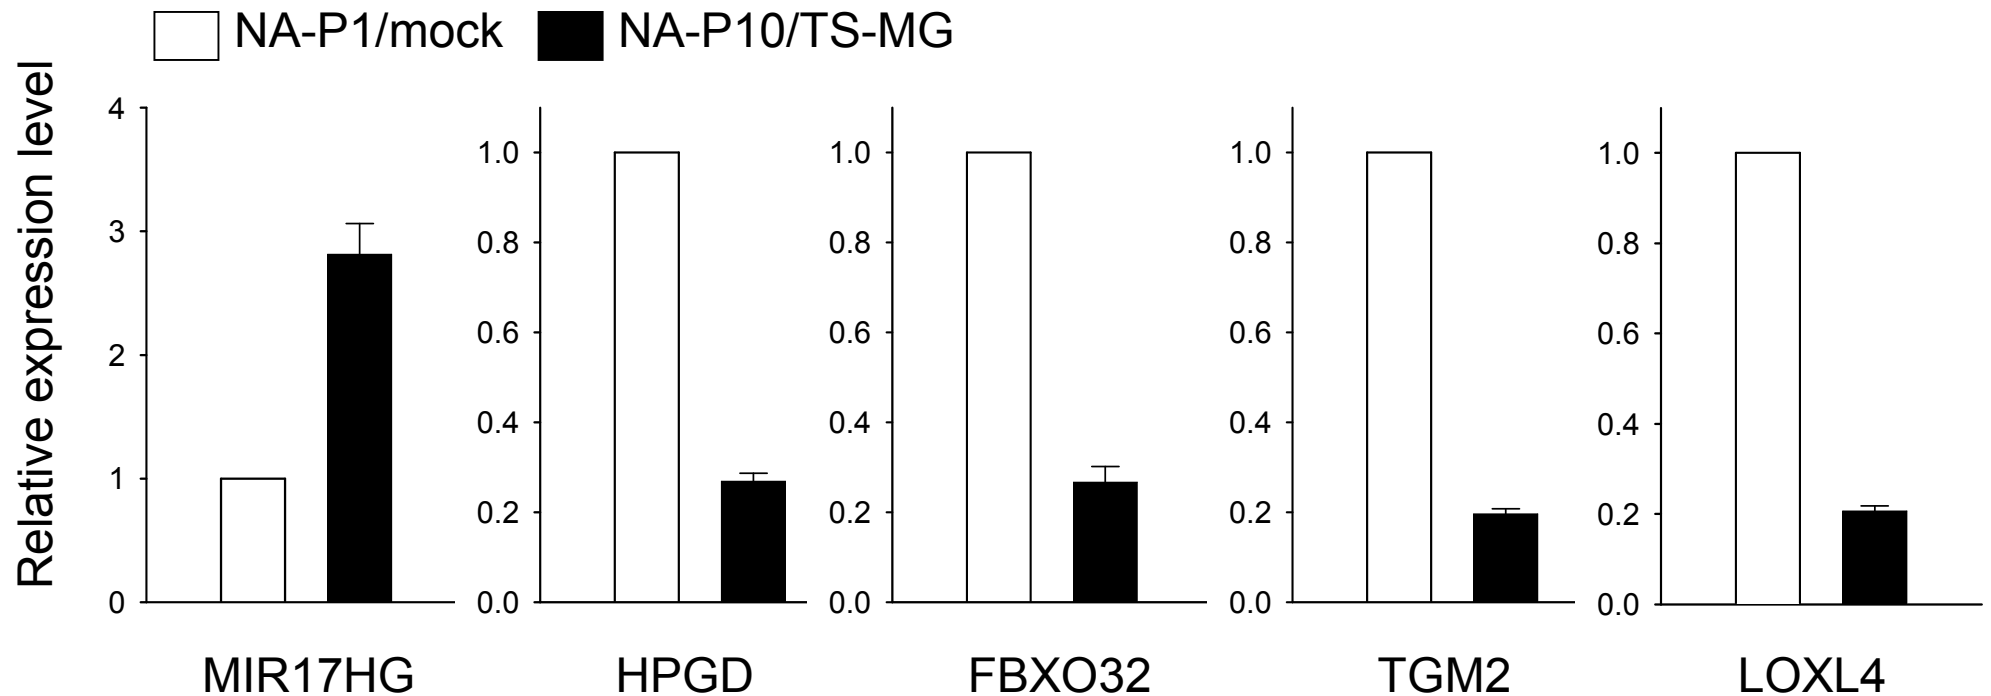

**Figure S1. Quantitative RT-PCR validation of genes that were differentially displayed in NA-P1/mock and NA-P10/TS-MG cells.** The expression level of gene in NA-P1/mock cells was adjusted as the base line (1-fold) and the relative expression level of gene in NA-P10/TS-MG cells was determined accordingly. Data indicate the mean expression level  $\pm$  SD. MIR17HG: miR-17-92 cluster host gene; HPGD: hydroxyprostaglandin dehydrogenase 15-(NAD); FBXO32: f-box only protein 32; TGM2: transglutaminases 2; LOXL4: lysyl oxidase homolog 4.
