# Supplementary material for: The Synergistic Effect of Chemical Carcinogens Enhances Epstein-Barr Virus Reactivation and Tumor Progression of Nasopharyngeal Carcinoma Cells
Source: PLoS One. 2012 Sep 14;7(9):e44810. doi: 10.1371/journal.pone.0044810 (PMC3443098; doi:10.1371/journal.pone.0044810)
Supplement: Table S2 — Ontology categorization of genes that were altered after recurrent EBV reactivation. The differentially expressed 618 probe sets were categorized by DAVID (the Database for Annotation, Visualization, and Integrated Discovery) to assign annotation groups, based on gene ontologies (GO). (XLS) [file pone.0044810.s003.xls]

## Sheet: DAVID_618
Category	Term	Count	%	PValue	Genes	List Total	Pop Hits	Pop Total	Fold Enrichment	Bonferroni	Benjamini	FDR
UP_SEQ_FEATURE	sequence variant	342	64.1651	0.0472507	200831_S_AT, 216918_S_AT, 228494_AT, 230532_AT, 201479_AT, 209792_S_AT, 204385_AT, 204532_X_AT, 200789_AT, 218565_AT, 228648_AT, 214022_S_AT, 209457_AT, 212325_AT, 201709_S_AT, 205613_AT, 202275_AT, 218953_S_AT, 219361_S_AT, 208354_S_AT, 227759_AT, 214044	515	11992	19113	1.05842	1	0.986502	55.5399
SP_PIR_KEYWORDS	polymorphism	334	62.6642	0.0218132	200831_S_AT, 216918_S_AT, 228494_AT, 230532_AT, 209792_S_AT, 204385_AT, 200789_AT, 204532_X_AT, 218565_AT, 228648_AT, 214022_S_AT, 209457_AT, 212325_AT, 201709_S_AT, 205613_AT, 202275_AT, 218953_S_AT, 219361_S_AT, 208354_S_AT, 227759_AT, 214044_AT, 235168	518	11550	19235	1.07381	0.999944	0.304188	26.8229
SP_PIR_KEYWORDS	phosphoprotein	241	45.2158	2.80966e-05	200831_S_AT, 203103_S_AT, 201302_AT, 222074_AT, 216918_S_AT, 228494_AT, 230532_AT, 214040_S_AT, 207622_S_AT, 219528_S_AT, 204237_AT, 201479_AT, 200789_AT, 227165_AT, 212325_AT, 201170_S_AT, 213258_AT, 226510_AT, 201802_AT, 218737_AT, 205613_AT, 209125_AT,	518	7263	19235	1.23215	0.0123976	0.00138516	0.0397767
SP_PIR_KEYWORDS	cytoplasm	118	22.1388	0.00103504	220613_S_AT, 222074_AT, 216918_S_AT, 221523_S_AT, 228494_AT, 209160_AT, 214040_S_AT, 204237_AT, 205623_AT, 204517_AT, 209877_AT, 204385_AT, 231727_S_AT, 203882_AT, 227165_AT, 201275_AT, 202284_S_AT, 242571_AT, 209720_S_AT, 202581_AT, 202149_AT, 239654_AT,	518	3332	19235	1.31504	0.368588	0.0323091	1.45565
SP_PIR_KEYWORDS	acetylation	102	19.137	0.000117456	203103_S_AT, 201302_AT, 222074_AT, 204972_AT, 224734_AT, 207622_S_AT, 201425_AT, 219528_S_AT, 205623_AT, 201479_AT, 225145_AT, 204385_AT, 204532_X_AT, 200789_AT, 201275_AT, 202284_S_AT, 209720_S_AT, 206094_X_AT, 202581_AT, 218737_AT, 201709_S_AT, 239654_A	518	2635	19235	1.43741	0.0508167	0.00520176	0.166186
GOTERM_CC_FAT	GO:0043228~non-membrane-bounded organelle	85	15.9475	0.0522279	204133_AT, 202643_S_AT, 216918_S_AT, 228494_AT, 201323_AT, 212233_AT, 224734_AT, 214040_S_AT, 201479_AT, 202708_S_AT, 200632_S_AT, 209877_AT, 228727_AT, 204734_AT, 225687_AT, 227165_AT, 227584_AT, 212331_AT, 224763_AT, 218199_S_AT, 236105_AT, 1556063_S_AT	352	2596	12782	1.18897	1	0.559544	51.5288
GOTERM_CC_FAT	GO:0043232~intracellular non-membrane-bounded organelle	85	15.9475	0.0522279	204133_AT, 202643_S_AT, 216918_S_AT, 228494_AT, 201323_AT, 212233_AT, 224734_AT, 214040_S_AT, 201479_AT, 202708_S_AT, 200632_S_AT, 209877_AT, 228727_AT, 204734_AT, 225687_AT, 227165_AT, 227584_AT, 212331_AT, 224763_AT, 218199_S_AT, 236105_AT, 1556063_S_AT	352	2596	12782	1.18897	1	0.559544	51.5288
UP_SEQ_FEATURE	mutagenesis site	76	14.2589	0.00333375	202643_S_AT, 220613_S_AT, 222074_AT, 202869_AT, 209160_AT, 205552_S_AT, 206324_S_AT, 218083_AT, 204972_AT, 204237_AT, 212344_AT, 223382_S_AT, 225145_AT, 209515_S_AT, 200790_AT, 202284_S_AT, 209720_S_AT, 211529_X_AT, 213258_AT, 213988_S_AT, 218983_AT, 2098	515	2045	19113	1.37925	0.995234	0.737253	5.43864
SP_PIR_KEYWORDS	hydrolase	72	13.5084	6.95718e-06	202643_S_AT, 223299_AT, 1552476_S_AT, 202939_AT, 212344_AT, 244780_AT, 209792_S_AT, 218986_S_AT, 204385_AT, 213275_X_AT, 207383_S_AT, 223849_S_AT, 209457_AT, 217388_S_AT, 1556063_S_AT, 210431_AT, 212766_S_AT, 208747_S_AT, 218983_AT, 219328_AT, 239654_AT,	518	1555	19235	1.71935	0.00308423	0.0005147	0.00985074
GOTERM_CC_FAT	GO:0031974~membrane-enclosed lumen	65	12.1951	0.029763	204133_AT, 203103_S_AT, 201323_AT, 224734_AT, 201425_AT, 201479_AT, 228727_AT, 203027_S_AT, 212331_AT, 202284_S_AT, 218199_S_AT, 236105_AT, 1556063_S_AT, 201010_S_AT, 201008_S_AT, 212766_S_AT, 219328_AT, 203913_S_AT, 205115_S_AT, 218161_S_AT, 217884_AT, 219361_S_AT, 225682_S_AT, 221712_S_AT, 1555427_S_AT, 201009_S_AT, 207746_AT, 223154_AT, 214011_S_AT, 205284_AT, 223518_AT, 205141_AT, 239108_AT, …	352	1856	12782	1.27172	0.999939	0.525777	33.4972
GOTERM_CC_FAT	GO:0043233~organelle lumen	63	11.8199	0.0399989	204133_AT, 203103_S_AT, 201323_AT, 224734_AT, 201425_AT, 201479_AT, 228727_AT, 203027_S_AT, 212331_AT, 202284_S_AT, 218199_S_AT, 236105_AT, 1556063_S_AT, 212766_S_AT, 219328_AT, 203913_S_AT, 205115_S_AT, 218161_S_AT, 217884_AT, 219361_S_AT, 225682_S_AT, 221712_S_AT, 1555427_S_AT, 207746_AT, 223154_AT, 214011_S_AT, 205284_AT, 223518_AT, 205141_AT, 212236_X_AT, 239108_AT, 205565_S_AT, 212464_S_AT, …	352	1820	12782	1.25697	0.999998	0.517113	42.3693
GOTERM_CC_FAT	GO:0070013~intracellular organelle lumen	62	11.6323	0.0371451	204133_AT, 203103_S_AT, 201323_AT, 224734_AT, 201425_AT, 201479_AT, 228727_AT, 203027_S_AT, 212331_AT, 202284_S_AT, 218199_S_AT, 236105_AT, 1556063_S_AT, 212766_S_AT, 219328_AT, 203913_S_AT, 205115_S_AT, 218161_S_AT, 217884_AT, 219361_S_AT, 225682_S_AT, 221712_S_AT, 1555427_S_AT, 207746_AT, 223154_AT, 214011_S_AT, 205284_AT, 223518_AT, 205141_AT, 212236_X_AT, 239108_AT, 205565_S_AT, 208926_AT, 23…	352	1779	12782	1.26553	0.999995	0.510683	40.0129
SP_PIR_KEYWORDS	disease mutation	56	10.5066	0.0323759	211423_S_AT, 222074_AT, 221701_S_AT, 202435_S_AT, 214040_S_AT, 202939_AT, 201479_AT, 209515_S_AT, 226929_AT, 204385_AT, 204532_X_AT, 218670_AT, 207076_S_AT, 217388_S_AT, 206094_X_AT, 202436_S_AT, 203913_S_AT, 218161_S_AT, 209125_AT, 202275_AT, 217127_AT, 221805_AT, 208354_S_AT, 227759_AT, 214044_AT, 209604_S_AT, 201506_AT, 201820_AT, 1554008_AT, 200742_S_AT, 205141_AT, 223278_AT, 212236_X_AT, 208…	518	1591	19235	1.30701	1	0.357771	37.2506
GOTERM_CC_FAT	GO:0031981~nuclear lumen	53	9.94371	0.0262323	204133_AT, 203103_S_AT, 201323_AT, 224734_AT, 201479_AT, 228727_AT, 212331_AT, 202284_S_AT, 218199_S_AT, 236105_AT, 212766_S_AT, 1556063_S_AT, 219328_AT, 203913_S_AT, 205115_S_AT, 217884_AT, 219361_S_AT, 225682_S_AT, 221712_S_AT, 1555427_S_AT, 207746_AT, 214011_S_AT, 205284_AT, 223518_AT, 205141_AT, 212236_X_AT, 234312_S_AT, 236288_AT, 221649_S_AT, 230821_AT, 222666_S_AT, 204733_AT, 216913_S_AT, …	352	1450	12782	1.32728	0.999803	0.508888	30.1546
GOTERM_CC_FAT	GO:0005829~cytosol	51	9.56848	0.0134576	222074_AT, 212233_AT, 218083_AT, 214040_S_AT, 205623_AT, 226929_AT, 200790_AT, 204385_AT, 203027_S_AT, 208708_X_AT, 202284_S_AT, 224763_AT, 217388_S_AT, 204615_X_AT, 203913_S_AT, 201565_S_AT, 202275_AT, 202286_S_AT, 220753_S_AT, 221805_AT, 208354_S_AT, 218217_AT, 200962_AT, 206662_AT, 205651_X_AT, 205822_S_AT, 212593_S_AT, 226858_AT, 213222_AT, 224209_S_AT, 204151_X_AT, 223518_AT, 201193_AT, 2021…	352	1330	12782	1.39243	0.987083	0.352686	16.7168
GOTERM_CC_FAT	GO:0000267~cell fraction	48	9.00563	0.00109324	223299_AT, 220613_S_AT, 202869_AT, 228494_AT, 201323_AT, 212233_AT, 205552_S_AT, 202435_S_AT, 204972_AT, 211911_X_AT, 1555385_AT, 202939_AT, 202264_S_AT, 204385_AT, 208729_X_AT, 204532_X_AT, 206508_AT, 213275_X_AT, 207383_S_AT, 216607_S_AT, 217388_S_AT, 206094_X_AT, 201802_AT, 217979_AT, 202436_S_AT, 208749_X_AT, 222703_S_AT, 213577_AT, 210950_S_AT, 208354_S_AT, 214044_AT, 213562_S_AT, 205651_X_A…	352	1083	12782	1.60942	0.296103	0.161014	1.46593
GOTERM_CC_FAT	GO:0005783~endoplasmic reticulum	43	8.06754	0.00175111	211423_S_AT, 200831_S_AT, 223299_AT, 202869_AT, 205552_S_AT, 202435_S_AT, 204972_AT, 205623_AT, 202939_AT, 212344_AT, 244780_AT, 204532_X_AT, 214788_X_AT, 228648_AT, 216607_S_AT, 206094_X_AT, 202581_AT, 202436_S_AT, 222603_AT, 208868_S_AT, 218161_S_AT, 220081_X_AT, 213577_AT, 204017_AT, 210950_S_AT, 227759_AT, 238567_AT, 209173_AT, 208869_S_AT, 214044_AT, 209631_S_AT, 213562_S_AT, 1555427_S_AT, 2…	352	960	12782	1.6265	0.430274	0.106421	2.33845
GOTERM_BP_FAT	GO:0010033~response to organic substance	41	7.69231	2.20095e-05	212233_AT, 202435_S_AT, 214040_S_AT, 201425_AT, 204385_AT, 204532_X_AT, 202284_S_AT, 217388_S_AT, 206094_X_AT, 202581_AT, 201010_S_AT, 201008_S_AT, 211538_S_AT, 208747_S_AT, 202436_S_AT, 209894_AT, 201565_S_AT, 213310_AT, 213577_AT, 221805_AT, 227759_AT, 214044_AT, 213562_S_AT, 209604_S_AT, 205822_S_AT, 201009_S_AT, 222844_S_AT, 201162_AT, 1554008_AT, 201193_AT, 205141_AT, 208596_S_AT, 215125_S_A…	376	721	13528	2.04595	0.0444117	0.00566242	0.0379738
GOTERM_CC_FAT	GO:0044421~extracellular region part	41	7.69231	0.00524986	216918_S_AT, 214040_S_AT, 212344_AT, 206569_AT, 218825_AT, 201427_S_AT, 208607_S_AT, 206508_AT, 206693_AT, 224560_AT, 213258_AT, 218983_AT, 222473_S_AT, 41469_AT, 209894_AT, 227145_AT, 227759_AT, 201506_AT, 201162_AT, 202998_S_AT, 205141_AT, 205014_AT, 212464_S_AT, 211355_X_AT, 204455_AT, 206907_AT, 200696_S_AT, 1405_I_AT, 203559_S_AT, 221577_X_AT, 206125_S_AT, 202997_S_AT, 216598_S_AT, 239272_AT…	352	960	12782	1.55085	0.815415	0.214455	6.85978
GOTERM_CC_FAT	GO:0005730~nucleolus	38	7.12946	9.31507e-05	204133_AT, 201323_AT, 224734_AT, 234312_S_AT, 201479_AT, 221649_S_AT, 230821_AT, 222666_S_AT, 204733_AT, 216913_S_AT, 1553972_A_AT, 218860_AT, 221549_AT, 203914_X_AT, 205157_S_AT, 219031_S_AT, 202863_AT, 218199_S_AT, 236105_AT, 209567_AT, 202212_AT, 212766_S_AT, 1556063_S_AT, 230656_S_AT, 219328_AT, 202115_S_AT, 220266_S_AT, 223179_AT, 203913_S_AT, 205115_S_AT, 209930_S_AT, 217884_AT, 219361_S_AT…	352	698	12782	1.9769	0.0294601	0.0294601	0.125688
GOTERM_CC_FAT	GO:0005624~membrane fraction	38	7.12946	0.00155423	223299_AT, 220613_S_AT, 202869_AT, 228494_AT, 201323_AT, 202435_S_AT, 205552_S_AT, 204972_AT, 211911_X_AT, 1555385_AT, 202939_AT, 202264_S_AT, 208729_X_AT, 204532_X_AT, 206508_AT, 207383_S_AT, 216607_S_AT, 206094_X_AT, 201802_AT, 217979_AT, 202436_S_AT, 208749_X_AT, 222703_S_AT, 213577_AT, 210950_S_AT, 208354_S_AT, 214044_AT, 213562_S_AT, 205651_X_AT, 1555427_S_AT, 213222_AT, 214459_X_AT, 204087_…	352	809	12782	1.70566	0.393042	0.117348	2.07807
GOTERM_CC_FAT	GO:0005626~insoluble fraction	38	7.12946	0.0029271	223299_AT, 220613_S_AT, 202869_AT, 228494_AT, 201323_AT, 202435_S_AT, 205552_S_AT, 204972_AT, 211911_X_AT, 1555385_AT, 202939_AT, 202264_S_AT, 208729_X_AT, 204532_X_AT, 206508_AT, 207383_S_AT, 216607_S_AT, 206094_X_AT, 201802_AT, 217979_AT, 202436_S_AT, 208749_X_AT, 222703_S_AT, 213577_AT, 210950_S_AT, 208354_S_AT, 214044_AT, 213562_S_AT, 205651_X_AT, 1555427_S_AT, 213222_AT, 214459_X_AT, 204087_…	352	839	12782	1.64467	0.609754	0.14515	3.88033
SP_PIR_KEYWORDS	endoplasmic reticulum	36	6.75422	0.000472481	211423_S_AT, 223299_AT, 200831_S_AT, 202869_AT, 202435_S_AT, 205552_S_AT, 204972_AT, 202939_AT, 212344_AT, 244780_AT, 204532_X_AT, 214788_X_AT, 216607_S_AT, 206094_X_AT, 202436_S_AT, 222603_AT, 208868_S_AT, 218161_S_AT, 213577_AT, 204017_AT, 210950_S_AT, 238567_AT, 209173_AT, 208869_S_AT, 209631_S_AT, 213562_S_AT, 1555427_S_AT, 235168_AT, 209146_AT, 201625_S_AT, 239108_AT, 208596_S_AT, 215125_S_A…	518	713	19235	1.87489	0.189279	0.0173339	0.666946
SP_PIR_KEYWORDS	oxidoreductase	35	6.5666	9.97895e-06	200831_S_AT, 211423_S_AT, 209160_AT, 206561_S_AT, 202435_S_AT, 203343_AT, 203559_S_AT, 209699_X_AT, 205623_AT, 201425_AT, 202997_S_AT, 208647_AT, 202201_AT, 208626_S_AT, 226929_AT, 216594_X_AT, 201790_S_AT, 1555037_A_AT, 229426_AT, 203914_X_AT, 239035_AT, 224966_S_AT, 202831_AT, 216607_S_AT, 209218_AT, 202436_S_AT, 203913_S_AT, 210046_S_AT, 202437_S_AT, 202275_AT, 227145_AT, 220081_X_AT, 213577_A…	518	562	19235	2.31257	0.00442087	0.000632753	0.014129
GOTERM_BP_FAT	GO:0055114~oxidation reduction	35	6.5666	0.000205981	200831_S_AT, 211423_S_AT, 209160_AT, 206561_S_AT, 202435_S_AT, 203343_AT, 203559_S_AT, 209699_X_AT, 205623_AT, 201425_AT, 202997_S_AT, 208647_AT, 202201_AT, 208626_S_AT, 226929_AT, 216594_X_AT, 201790_S_AT, 1555037_A_AT, 229426_AT, 203914_X_AT, 239035_AT, 224966_S_AT, 202831_AT, 216607_S_AT, 209218_AT, 202436_S_AT, 203913_S_AT, 210046_S_AT, 202437_S_AT, 202275_AT, 227145_AT, 220081_X_AT, 213577_A…	376	639	13528	1.97067	0.346354	0.0416277	0.354856
GOTERM_CC_FAT	GO:0005615~extracellular space	34	6.37899	0.00120873	211355_X_AT, 206907_AT, 1405_I_AT, 200696_S_AT, 203559_S_AT, 214040_S_AT, 221577_X_AT, 202997_S_AT, 206125_S_AT, 212344_AT, 206569_AT, 218825_AT, 216598_S_AT, 201427_S_AT, 200649_AT, 222242_S_AT, 208607_S_AT, 206508_AT, 202525_AT, 206693_AT, 213258_AT, 218983_AT, 209894_AT, 204655_AT, 202068_S_AT, 217767_AT, 200646_S_AT, 227145_AT, 211248_S_AT, 227759_AT, 201787_AT, 201506_AT, 201162_AT, 1555759_…	352	685	12782	1.80237	0.321748	0.121388	1.61961
GOTERM_BP_FAT	GO:0042981~regulation of apoptosis	32	6.00375	0.0394435	202643_S_AT, 201302_AT, 206864_S_AT, 206324_S_AT, 224734_AT, 225912_AT, 219528_S_AT, 209015_S_AT, 235626_AT, 202086_AT, 216598_S_AT, 209515_S_AT, 226543_AT, 206508_AT, 213275_X_AT, 202284_S_AT, 206693_AT, 211475_S_AT, 201008_S_AT, 201010_S_AT, 202581_AT, 205070_AT, 203140_AT, 201042_AT, 219361_S_AT, 227759_AT, 221805_AT, 214044_AT, 227697_AT, 201009_S_AT, 1552701_A_AT, 223506_AT, 223518_AT, 20461…	376	804	13528	1.43199	1	0.721366	50.0647
GOTERM_BP_FAT	GO:0043067~regulation of programmed cell death	32	6.00375	0.0435341	202643_S_AT, 201302_AT, 206864_S_AT, 206324_S_AT, 224734_AT, 225912_AT, 219528_S_AT, 209015_S_AT, 235626_AT, 202086_AT, 216598_S_AT, 209515_S_AT, 226543_AT, 206508_AT, 213275_X_AT, 202284_S_AT, 206693_AT, 211475_S_AT, 201008_S_AT, 201010_S_AT, 202581_AT, 205070_AT, 203140_AT, 201042_AT, 219361_S_AT, 227759_AT, 221805_AT, 214044_AT, 227697_AT, 201009_S_AT, 1552701_A_AT, 223506_AT, 223518_AT, 20461…	376	812	13528	1.41788	1	0.720837	53.6101
GOTERM_BP_FAT	GO:0010941~regulation of cell death	32	6.00375	0.0455923	202643_S_AT, 201302_AT, 206864_S_AT, 206324_S_AT, 224734_AT, 225912_AT, 219528_S_AT, 209015_S_AT, 235626_AT, 202086_AT, 216598_S_AT, 209515_S_AT, 226543_AT, 206508_AT, 213275_X_AT, 202284_S_AT, 206693_AT, 211475_S_AT, 201008_S_AT, 201010_S_AT, 202581_AT, 205070_AT, 203140_AT, 201042_AT, 219361_S_AT, 227759_AT, 221805_AT, 214044_AT, 227697_AT, 201009_S_AT, 1552701_A_AT, 223506_AT, 223518_AT, 20461…	376	815	13528	1.41266	1	0.727892	55.3029
GOTERM_MF_FAT	GO:0008233~peptidase activity	31	5.81614	0.00135864	202643_S_AT, 223299_AT, 202357_S_AT, 202939_AT, 206125_S_AT, 239272_AT, 211668_S_AT, 209792_S_AT, 204733_AT, 222242_S_AT, 213275_X_AT, 202525_AT, 207383_S_AT, 200743_S_AT, 208747_S_AT, 218983_AT, 203021_AT, 222603_AT, 212067_S_AT, 1555229_A_AT, 227103_S_AT, 219909_AT, 220177_S_AT, 226019_AT, 227759_AT, 202458_AT, 218217_AT, 204398_S_AT, 1552701_A_AT, 238012_AT, 239381_AT, 200742_S_AT, 205778_AT, …	378	574	12983	1.85495	0.577667	0.158351	2.00278
GOTERM_MF_FAT	GO:0003723~RNA binding	31	5.81614	0.028921	204133_AT, 202869_AT, 205552_S_AT, 204972_AT, 227884_AT, 240806_AT, 201479_AT, 224767_AT, 218986_S_AT, 201531_AT, 205763_S_AT, 218670_AT, 225385_S_AT, 219031_S_AT, 223849_S_AT, 224763_AT, 218199_S_AT, 219328_AT, 227891_S_AT, 205115_S_AT, 210463_X_AT, 225398_AT, 213310_AT, 209488_S_AT, 209025_S_AT, 228230_AT, 228304_AT, 200962_AT, 1555427_S_AT, 213063_AT, 212593_S_AT, 218984_AT, 223154_AT, 205141_…	378	718	12983	1.48293	1	0.710737	35.384
GOTERM_MF_FAT	GO:0070011~peptidase activity, acting on L-amino acid peptides	30	5.62852	0.00139248	202643_S_AT, 223299_AT, 202357_S_AT, 202939_AT, 206125_S_AT, 239272_AT, 211668_S_AT, 209792_S_AT, 204733_AT, 222242_S_AT, 213275_X_AT, 202525_AT, 207383_S_AT, 200743_S_AT, 208747_S_AT, 218983_AT, 222603_AT, 212067_S_AT, 1555229_A_AT, 227103_S_AT, 219909_AT, 220177_S_AT, 226019_AT, 202458_AT, 227759_AT, 218217_AT, 204398_S_AT, 1552701_A_AT, 238012_AT, 239381_AT, 200742_S_AT, 205778_AT, 204614_AT, …	378	549	12983	1.87686	0.586645	0.136915	2.0522
GOTERM_BP_FAT	GO:0042127~regulation of cell proliferation	30	5.62852	0.072033	219528_S_AT, 216598_S_AT, 211668_S_AT, 201790_S_AT, 200790_AT, 203027_S_AT, 214022_S_AT, 202284_S_AT, 206693_AT, 224560_AT, 201008_S_AT, 201010_S_AT, 231579_S_AT, 225639_AT, 203140_AT, 201042_AT, 201601_X_AT, 220266_S_AT, 201565_S_AT, 209125_AT, 217127_AT, 200953_S_AT, 201820_AT, 201009_S_AT, 203167_AT, 203421_AT, 201667_AT, 209782_S_AT, 201162_AT, 224847_AT, 236313_AT, 1554008_AT, 205141_AT, 205…	376	787	13528	1.37149	1	0.799576	72.475
GOTERM_CC_FAT	GO:0012505~endomembrane system	29	5.4409	0.0903316	200831_S_AT, 223299_AT, 202435_S_AT, 218305_AT, 203718_AT, 231861_AT, 1555385_AT, 208647_AT, 202180_S_AT, 209515_S_AT, 228727_AT, 201790_S_AT, 216607_S_AT, 209218_AT, 210868_S_AT, 202436_S_AT, 202437_S_AT, 202068_S_AT, 223632_S_AT, 219304_S_AT, 220081_X_AT, 213577_AT, 227103_S_AT, 220177_S_AT, 210950_S_AT, 214044_AT, 228411_AT, 213562_S_AT, 235168_AT, 209146_AT, 201667_AT, 200832_S_AT, 1558292_S_…	352	782	12782	1.34663	1	0.689283	72.146
SP_PIR_KEYWORDS	Protease	28	5.25328	0.000304803	202643_S_AT, 223299_AT, 202357_S_AT, 202939_AT, 206125_S_AT, 239272_AT, 211668_S_AT, 204733_AT, 209792_S_AT, 222242_S_AT, 213275_X_AT, 202525_AT, 207383_S_AT, 200743_S_AT, 208747_S_AT, 218983_AT, 203021_AT, 222603_AT, 212067_S_AT, 1555229_A_AT, 227103_S_AT, 219909_AT, 220177_S_AT, 226019_AT, 202458_AT, 227759_AT, 218217_AT, 238012_AT, 239381_AT, 200742_S_AT, 205778_AT, 204279_AT	518	484	19235	2.1482	0.126593	0.0122294	0.430729
GOTERM_BP_FAT	GO:0010605~negative regulation of macromolecule metabolic process	28	5.25328	0.0812642	206864_S_AT, 218219_S_AT, 224734_AT, 230821_AT, 209015_S_AT, 206658_AT, 222047_S_AT, 202863_AT, 223849_S_AT, 208436_S_AT, 201170_S_AT, 203140_AT, 220266_S_AT, 213310_AT, 201565_S_AT, 202275_AT, 203275_AT, 226267_AT, 227759_AT, 212614_AT, 209505_AT, 212593_S_AT, 204175_AT, 223506_AT, 202455_AT, 205141_AT, 204610_S_AT, 204279_AT	376	734	13528	1.37249	1	0.817029	76.8367
GOTERM_BP_FAT	GO:0009611~response to wounding	27	5.06567	0.0034594	212233_AT, 202357_S_AT, 200696_S_AT, 1405_I_AT, 214040_S_AT, 229053_AT, 206125_S_AT, 216598_S_AT, 211668_S_AT, 209515_S_AT, 204733_AT, 208607_S_AT, 213275_X_AT, 208436_S_AT, 213258_AT, 208747_S_AT, 218983_AT, 204655_AT, 218901_AT, 205613_AT, 223217_S_AT, 217767_AT, 212067_S_AT, 1555229_A_AT, 202430_S_AT, 221805_AT, 203058_S_AT, 1555759_A_AT, 203060_S_AT, 202455_AT, 204614_AT, 225102_AT, 212464_S_…	376	530	13528	1.83288	0.999217	0.257716	5.80474
GOTERM_BP_FAT	GO:0008610~lipid biosynthetic process	26	4.87805	3.73591e-06	203103_S_AT, 211423_S_AT, 200831_S_AT, 202245_AT, 218083_AT, 1555385_AT, 234312_S_AT, 208647_AT, 201790_S_AT, 203027_S_AT, 201275_AT, 216607_S_AT, 208881_X_AT, 214917_AT, 209218_AT, 210868_S_AT, 204615_X_AT, 215649_S_AT, 220081_X_AT, 202275_AT, 213577_AT, 201127_S_AT, 210950_S_AT, 213562_S_AT, 205822_S_AT, 235168_AT, 209146_AT, 200832_S_AT, 1558292_S_AT, 205141_AT, 239108_AT	376	323	13528	2.89612	0.00768129	0.00110096	0.00644666
GOTERM_BP_FAT	GO:0008202~steroid metabolic process	25	4.69043	1.85921e-09	215125_S_AT, 211423_S_AT, 211355_X_AT, 206561_S_AT, 202435_S_AT, 202245_AT, 209699_X_AT, 208647_AT, 216594_X_AT, 201790_S_AT, 204532_X_AT, 203027_S_AT, 201275_AT, 216607_S_AT, 206094_X_AT, 208881_X_AT, 214917_AT, 209218_AT, 204615_X_AT, 202436_S_AT, 209894_AT, 215649_S_AT, 202437_S_AT, 201626_AT, 218161_S_AT, 202068_S_AT, 202275_AT, 220081_X_AT, 213577_AT, 210950_S_AT, 227759_AT, 211653_X_AT, 213…	376	202	13528	4.45281	3.83741e-06	9.59354e-07	3.20834e-06
GOTERM_MF_FAT	GO:0004175~endopeptidase activity	25	4.69043	0.000252344	202357_S_AT, 202939_AT, 206125_S_AT, 239272_AT, 211668_S_AT, 204733_AT, 209792_S_AT, 222242_S_AT, 202525_AT, 213275_X_AT, 207383_S_AT, 200743_S_AT, 208747_S_AT, 218983_AT, 212067_S_AT, 1555229_A_AT, 227103_S_AT, 219909_AT, 220177_S_AT, 226019_AT, 202458_AT, 227759_AT, 204398_S_AT, 1552701_A_AT, 239381_AT, 200742_S_AT, 205778_AT, 204614_AT, 204279_AT	378	375	12983	2.28977	0.147862	0.0392121	0.374847
GOTERM_BP_FAT	GO:0009719~response to endogenous stimulus	24	4.50281	0.000939186	215125_S_AT, 201173_X_AT, 211355_X_AT, 212233_AT, 1405_I_AT, 201425_AT, 216598_S_AT, 1555037_A_AT, 204532_X_AT, 202525_AT, 202284_S_AT, 206094_X_AT, 201010_S_AT, 201008_S_AT, 209894_AT, 204179_AT, 210574_S_AT, 232560_AT, 204655_AT, 202068_S_AT, 221805_AT, 227759_AT, 200953_S_AT, 202022_AT, 209604_S_AT, 207126_X_AT, 205822_S_AT, 227697_AT, 201009_S_AT, 201162_AT, 1555759_A_AT, 202455_AT, 201193_AT…	376	405	13528	2.13207	0.856208	0.114154	1.60839
GOTERM_BP_FAT	GO:0010629~negative regulation of gene expression	24	4.50281	0.0133453	203140_AT, 206864_S_AT, 218219_S_AT, 220266_S_AT, 224734_AT, 213310_AT, 201565_S_AT, 203275_AT, 209015_S_AT, 230821_AT, 206658_AT, 226267_AT, 212614_AT, 209505_AT, 222047_S_AT, 212593_S_AT, 204175_AT, 202863_AT, 223506_AT, 208436_S_AT, 223849_S_AT, 202455_AT, 201170_S_AT, 204610_S_AT	376	504	13528	1.71327	1	0.537116	20.6929
GOTERM_BP_FAT	GO:0006396~RNA processing	24	4.50281	0.0307768	203103_S_AT, 204133_AT, 217786_AT, 201420_S_AT, 221649_S_AT, 201479_AT, 201531_AT, 222047_S_AT, 218670_AT, 225385_S_AT, 223849_S_AT, 224966_S_AT, 1556063_S_AT, 202212_AT, 210463_X_AT, 209488_S_AT, 213310_AT, 201584_S_AT, 209025_S_AT, 1554317_S_AT, 1555427_S_AT, 218914_AT, 218984_AT, 223154_AT, 204012_S_AT, 1564521_X_AT	376	547	13528	1.57859	1	0.664985	41.6926
SP_PIR_KEYWORDS	ubl conjugation	24	4.50281	0.0472428	229582_AT, 216918_S_AT, 204455_AT, 224734_AT, 211911_X_AT, 211799_X_AT, 236288_AT, 202708_S_AT, 1553972_A_AT, 208729_X_AT, 202863_AT, 202284_S_AT, 203453_AT, 201170_S_AT, 211475_S_AT, 202212_AT, 201010_S_AT, 201008_S_AT, 220266_S_AT, 223179_AT, 201626_AT, 209930_S_AT, 209025_S_AT, 203275_AT, 215444_S_AT, 209631_S_AT, 208170_S_AT, 1555427_S_AT, 201009_S_AT, 214459_X_AT, 208812_X_AT, 202455_AT, 201…	518	588	19235	1.51564	1	0.423604	49.6043
GOTERM_BP_FAT	GO:0031327~negative regulation of cellular biosynthetic process	23	4.3152	0.0639092	214917_AT, 203140_AT, 218219_S_AT, 220266_S_AT, 224734_AT, 213310_AT, 201565_S_AT, 203275_AT, 209015_S_AT, 230821_AT, 203859_S_AT, 226267_AT, 212614_AT, 209505_AT, 212593_S_AT, 204175_AT, 202863_AT, 223506_AT, 208436_S_AT, 202455_AT, 201170_S_AT, 205141_AT, 204610_S_AT	376	561	13528	1.47506	1	0.79129	68.0074
GOTERM_BP_FAT	GO:0009890~negative regulation of biosynthetic process	23	4.3152	0.0770648	214917_AT, 203140_AT, 218219_S_AT, 220266_S_AT, 224734_AT, 213310_AT, 201565_S_AT, 203275_AT, 209015_S_AT, 230821_AT, 203859_S_AT, 226267_AT, 212614_AT, 209505_AT, 212593_S_AT, 204175_AT, 202863_AT, 223506_AT, 208436_S_AT, 202455_AT, 201170_S_AT, 205141_AT, 204610_S_AT	376	573	13528	1.44417	1	0.812124	74.9401
UP_SEQ_FEATURE	binding site:Substrate	22	4.12758	5.85093e-05	222074_AT, 208926_AT, 209160_AT, 206561_S_AT, 203343_AT, 1552476_S_AT, 209699_X_AT, 216594_X_AT, 1555037_A_AT, 204565_AT, 203914_X_AT, 213988_S_AT, 208881_X_AT, 204615_X_AT, 210046_S_AT, 203913_S_AT, 220081_X_AT, 202275_AT, 217127_AT, 211653_X_AT, 202022_AT, 1553994_AT, 208955_AT, 204151_X_AT, 224209_S_AT, 201193_AT, 206574_S_AT	515	297	19113	2.74908	0.0894224	0.0894224	0.0979364
SP_PIR_KEYWORDS	rna-binding	22	4.12758	0.0587204	204133_AT, 202869_AT, 205552_S_AT, 227884_AT, 204972_AT, 201479_AT, 218986_S_AT, 224767_AT, 205763_S_AT, 225385_S_AT, 219031_S_AT, 223849_S_AT, 224763_AT, 218199_S_AT, 219328_AT, 227891_S_AT, 205115_S_AT, 209488_S_AT, 213310_AT, 209025_S_AT, 228304_AT, 1555427_S_AT, 212593_S_AT, 213063_AT, 223506_AT, 206632_S_AT	518	540	19235	1.51283	1	0.457003	57.5515
GOTERM_MF_FAT	GO:0008236~serine-type peptidase activity	21	3.93996	2.28804e-07	223299_AT, 208747_S_AT, 218983_AT, 202357_S_AT, 212067_S_AT, 206125_S_AT, 1555229_A_AT, 220177_S_AT, 211668_S_AT, 204733_AT, 202458_AT, 209792_S_AT, 227759_AT, 218217_AT, 204398_S_AT, 222242_S_AT, 238012_AT, 202525_AT, 207383_S_AT, 200743_S_AT, 200742_S_AT, 239381_AT, 205778_AT, 204614_AT	378	178	12983	4.05212	0.000145051	0.000145051	0.000340474
GOTERM_MF_FAT	GO:0017171~serine hydrolase activity	21	3.93996	2.74785e-07	223299_AT, 208747_S_AT, 218983_AT, 202357_S_AT, 212067_S_AT, 206125_S_AT, 1555229_A_AT, 220177_S_AT, 211668_S_AT, 204733_AT, 202458_AT, 209792_S_AT, 227759_AT, 218217_AT, 204398_S_AT, 222242_S_AT, 238012_AT, 202525_AT, 207383_S_AT, 200743_S_AT, 200742_S_AT, 239381_AT, 205778_AT, 204614_AT	378	180	12983	4.0071	0.000174199	8.71032e-05	0.000408897
GOTERM_BP_FAT	GO:0009725~response to hormone stimulus	21	3.93996	0.00322304	215125_S_AT, 201173_X_AT, 211355_X_AT, 212233_AT, 1405_I_AT, 201425_AT, 216598_S_AT, 1555037_A_AT, 204532_X_AT, 202525_AT, 202284_S_AT, 206094_X_AT, 201008_S_AT, 201010_S_AT, 209894_AT, 204179_AT, 210574_S_AT, 204655_AT, 202068_S_AT, 221805_AT, 227759_AT, 200953_S_AT, 209604_S_AT, 207126_X_AT, 227697_AT, 201009_S_AT, 201162_AT, 1555759_A_AT, 202455_AT, 201193_AT, 205141_AT, 208596_S_AT	376	367	13528	2.05873	0.998723	0.251512	5.41848
GOTERM_MF_FAT	GO:0008092~cytoskeletal protein binding	21	3.93996	0.0979578	216918_S_AT, 229893_AT, 204455_AT, 228494_AT, 212233_AT, 200696_S_AT, 214040_S_AT, 203563_AT, 209515_S_AT, 221042_S_AT, 231251_AT, 230645_AT, 212325_AT, 203453_AT, 228256_S_AT, 208868_S_AT, 212327_AT, 212775_AT, 219756_S_AT, 208869_S_AT, 202022_AT, 203661_S_AT, 220120_S_AT, 225548_AT, 205141_AT, 1554026_A_AT, 218084_X_AT	378	504	12983	1.43111	1	0.83726	78.4351
GOTERM_BP_FAT	GO:0016125~sterol metabolic process	19	3.56473	2.84121e-10	211423_S_AT, 211355_X_AT, 202245_AT, 208647_AT, 201790_S_AT, 203027_S_AT, 201275_AT, 216607_S_AT, 208881_X_AT, 214917_AT, 209218_AT, 204615_X_AT, 209894_AT, 215649_S_AT, 218161_S_AT, 201626_AT, 202068_S_AT, 202275_AT, 213577_AT, 210950_S_AT, 227759_AT, 213562_S_AT, 205822_S_AT, 209146_AT, 201625_S_AT, 201627_S_AT	376	101	13528	6.76827	5.86426e-07	2.93213e-07	4.90292e-07
SP_PIR_KEYWORDS	repressor	19	3.56473	0.0476761	203140_AT, 221530_S_AT, 223217_S_AT, 213310_AT, 219528_S_AT, 203275_AT, 230821_AT, 225145_AT, 226267_AT, 226275_AT, 212331_AT, 223506_AT, 232383_AT, 209102_S_AT, 228928_X_AT, 219966_X_AT, 202455_AT, 205471_S_AT, 204610_S_AT, 213293_S_AT	518	435	19235	1.62191	1	0.418553	49.9278
GOTERM_BP_FAT	GO:0016481~negative regulation of transcription	19	3.56473	0.0889164	203140_AT, 218219_S_AT, 220266_S_AT, 224734_AT, 201565_S_AT, 203275_AT, 230821_AT, 209015_S_AT, 226267_AT, 212614_AT, 209505_AT, 212593_S_AT, 204175_AT, 202863_AT, 223506_AT, 208436_S_AT, 202455_AT, 201170_S_AT, 204610_S_AT	376	459	13528	1.48932	1	0.836871	79.9498
SP_PIR_KEYWORDS	lipid synthesis	18	3.37711	9.40785e-10	208881_X_AT, 211423_S_AT, 200831_S_AT, 214917_AT, 204615_X_AT, 210868_S_AT, 215649_S_AT, 202245_AT, 218083_AT, 220081_X_AT, 208647_AT, 201127_S_AT, 210950_S_AT, 201790_S_AT, 205822_S_AT, 209146_AT, 203027_S_AT, 201275_AT, 200832_S_AT, 216607_S_AT, 239108_AT	518	98	19235	6.82038	4.17709e-07	1.39236e-07	1.33213e-06
GOTERM_MF_FAT	GO:0004252~serine-type endopeptidase activity	18	3.37711	2.37785e-06	208747_S_AT, 218983_AT, 202357_S_AT, 212067_S_AT, 206125_S_AT, 1555229_A_AT, 220177_S_AT, 211668_S_AT, 204733_AT, 202458_AT, 209792_S_AT, 227759_AT, 204398_S_AT, 222242_S_AT, 202525_AT, 207383_S_AT, 200743_S_AT, 200742_S_AT, 239381_AT, 205778_AT, 204614_AT	378	154	12983	4.01453	0.00150642	0.000502393	0.00353833
GOTERM_BP_FAT	GO:0008283~cell proliferation	18	3.37711	0.0989707	203103_S_AT, 201173_X_AT, 217786_AT, 221530_S_AT, 206907_AT, 210574_S_AT, 209100_AT, 201626_AT, 206125_S_AT, 201479_AT, 203275_AT, 202286_S_AT, 226275_AT, 242538_AT, 222047_S_AT, 201506_AT, 206508_AT, 1554008_AT, 201627_S_AT, 201625_S_AT, 202212_AT, 1564521_X_AT	376	436	13528	1.48536	1	0.858506	83.444
GOTERM_BP_FAT	GO:0008203~cholesterol metabolic process	17	3.18949	4.08671e-09	208881_X_AT, 214917_AT, 209218_AT, 204615_X_AT, 211355_X_AT, 209894_AT, 215649_S_AT, 202245_AT, 201626_AT, 218161_S_AT, 202068_S_AT, 208647_AT, 202275_AT, 213577_AT, 210950_S_AT, 227759_AT, 201790_S_AT, 213562_S_AT, 205822_S_AT, 203027_S_AT, 201275_AT, 216607_S_AT, 201627_S_AT, 201625_S_AT	376	92	13528	6.64824	8.43494e-06	1.68699e-06	7.05221e-06
SP_PIR_KEYWORDS	Serine protease	17	3.18949	7.90369e-07	208747_S_AT, 218983_AT, 202357_S_AT, 212067_S_AT, 206125_S_AT, 1555229_A_AT, 220177_S_AT, 211668_S_AT, 204733_AT, 202458_AT, 209792_S_AT, 227759_AT, 222242_S_AT, 238012_AT, 202525_AT, 207383_S_AT, 200743_S_AT, 200742_S_AT, 239381_AT, 205778_AT	518	136	19235	4.64165	0.000350862	7.01823e-05	0.00111914
UP_SEQ_FEATURE	active site:Charge relay system	17	3.18949	8.36782e-05	208747_S_AT, 218983_AT, 202357_S_AT, 212067_S_AT, 206125_S_AT, 1555229_A_AT, 220177_S_AT, 211668_S_AT, 204733_AT, 202458_AT, 209792_S_AT, 227759_AT, 222242_S_AT, 238012_AT, 202525_AT, 200743_S_AT, 200742_S_AT, 239381_AT, 205778_AT, 225102_AT	515	196	19113	3.21895	0.125387	0.0647928	0.140038
GOTERM_BP_FAT	GO:0009991~response to extracellular stimulus	17	3.18949	0.000425334	215125_S_AT, 206864_S_AT, 211355_X_AT, 212233_AT, 202357_S_AT, 200696_S_AT, 214040_S_AT, 216598_S_AT, 204385_AT, 204532_X_AT, 202284_S_AT, 202863_AT, 217388_S_AT, 206094_X_AT, 209894_AT, 220266_S_AT, 39249_AT, 227759_AT, 214044_AT, 207126_X_AT, 227697_AT, 39248_AT, 201162_AT, 210663_S_AT, 236313_AT, 208596_S_AT	376	220	13528	2.78017	0.584418	0.0653137	0.731443
GOTERM_MF_FAT	GO:0048037~cofactor binding	17	3.18949	0.00254573	209218_AT, 210046_S_AT, 203343_AT, 203913_S_AT, 232560_AT, 203559_S_AT, 202275_AT, 213577_AT, 217127_AT, 219205_AT, 227094_AT, 202201_AT, 220753_S_AT, 204385_AT, 213562_S_AT, 1555037_A_AT, 224812_AT, 1553972_A_AT, 222844_S_AT, 203914_X_AT, 210663_S_AT, 224966_S_AT, 217388_S_AT, 201193_AT	378	249	12983	2.34495	0.801318	0.18291	3.722
GOTERM_BP_FAT	GO:0044271~nitrogen compound biosynthetic process	17	3.18949	0.0192556	222074_AT, 215165_X_AT, 232560_AT, 217127_AT, 219205_AT, 213106_AT, 213302_AT, 201516_AT, 200790_AT, 204385_AT, 1553972_A_AT, 1553994_AT, 222844_S_AT, 212135_S_AT, 207076_S_AT, 210663_S_AT, 212136_AT, 217388_S_AT, 202706_S_AT, 201243_S_AT, 205565_S_AT, 202144_S_AT	376	325	13528	1.88196	1	0.590085	28.5037
GOTERM_BP_FAT	GO:0043066~negative regulation of apoptosis	17	3.18949	0.0379073	202643_S_AT, 201302_AT, 206864_S_AT, 203140_AT, 201042_AT, 224734_AT, 219528_S_AT, 216598_S_AT, 221805_AT, 227697_AT, 226543_AT, 202284_S_AT, 206693_AT, 223518_AT, 211475_S_AT, 204614_AT, 201301_S_AT, 202581_AT	376	354	13528	1.72779	1	0.712428	48.6685
GOTERM_BP_FAT	GO:0043069~negative regulation of programmed cell death	17	3.18949	0.0421755	202643_S_AT, 201302_AT, 206864_S_AT, 203140_AT, 201042_AT, 224734_AT, 219528_S_AT, 216598_S_AT, 221805_AT, 227697_AT, 226543_AT, 202284_S_AT, 206693_AT, 223518_AT, 211475_S_AT, 204614_AT, 201301_S_AT, 202581_AT	376	359	13528	1.70373	1	0.724446	52.4597
GOTERM_BP_FAT	GO:0060548~negative regulation of cell death	17	3.18949	0.0435327	202643_S_AT, 201302_AT, 206864_S_AT, 203140_AT, 201042_AT, 224734_AT, 219528_S_AT, 216598_S_AT, 221805_AT, 227697_AT, 226543_AT, 202284_S_AT, 206693_AT, 223518_AT, 211475_S_AT, 204614_AT, 201301_S_AT, 202581_AT	376	360	13528	1.699	1	0.725797	53.6089
SP_PIR_KEYWORDS	nadp	16	3.00188	2.09742e-05	211423_S_AT, 206561_S_AT, 209160_AT, 210046_S_AT, 209699_X_AT, 205623_AT, 220081_X_AT, 208647_AT, 202275_AT, 202201_AT, 210950_S_AT, 211653_X_AT, 216594_X_AT, 226929_AT, 201790_S_AT, 1555037_A_AT, 204151_X_AT, 239035_AT, 216607_S_AT, 201193_AT, 239108_AT	518	156	19235	3.80853	0.00926943	0.0011634	0.0296949
GOTERM_BP_FAT	GO:0048545~response to steroid hormone stimulus	16	3.00188	0.00029928	215125_S_AT, 211355_X_AT, 212233_AT, 1405_I_AT, 201425_AT, 216598_S_AT, 1555037_A_AT, 204532_X_AT, 202525_AT, 202284_S_AT, 206094_X_AT, 201008_S_AT, 201010_S_AT, 209894_AT, 204655_AT, 202068_S_AT, 221805_AT, 200953_S_AT, 209604_S_AT, 207126_X_AT, 227697_AT, 201009_S_AT, 201162_AT, 1555759_A_AT, 201193_AT, 208596_S_AT	376	192	13528	2.99823	0.460874	0.0546161	0.515196
GOTERM_BP_FAT	GO:0031667~response to nutrient levels	16	3.00188	0.000389462	215125_S_AT, 206864_S_AT, 211355_X_AT, 212233_AT, 202357_S_AT, 200696_S_AT, 214040_S_AT, 216598_S_AT, 204385_AT, 204532_X_AT, 202863_AT, 217388_S_AT, 206094_X_AT, 209894_AT, 220266_S_AT, 39249_AT, 227759_AT, 214044_AT, 207126_X_AT, 227697_AT, 39248_AT, 201162_AT, 210663_S_AT, 236313_AT, 208596_S_AT	376	197	13528	2.92213	0.552468	0.0648053	0.66995
GOTERM_CC_FAT	GO:0044432~endoplasmic reticulum part	16	3.00188	0.0566851	223299_AT, 209218_AT, 210868_S_AT, 202436_S_AT, 202435_S_AT, 218161_S_AT, 203718_AT, 202437_S_AT, 220081_X_AT, 208647_AT, 213577_AT, 220177_S_AT, 210950_S_AT, 214044_AT, 201790_S_AT, 213562_S_AT, 226543_AT, 235168_AT, 209146_AT, 1558292_S_AT, 216607_S_AT	352	347	12782	1.67435	1	0.573206	54.5175
GOTERM_BP_FAT	GO:0008285~negative regulation of cell proliferation	16	3.00188	0.0771165	231579_S_AT, 203140_AT, 225639_AT, 220266_S_AT, 201601_X_AT, 219528_S_AT, 217127_AT, 203167_AT, 203421_AT, 201820_AT, 201667_AT, 201162_AT, 202284_S_AT, 214022_S_AT, 224847_AT, 236313_AT, 224560_AT, 205141_AT, 205014_AT	376	361	13528	1.59462	1	0.809177	74.9643
GOTERM_BP_FAT	GO:0006694~steroid biosynthetic process	15	2.81426	7.90855e-08	208881_X_AT, 211423_S_AT, 214917_AT, 209218_AT, 204615_X_AT, 215649_S_AT, 202245_AT, 220081_X_AT, 208647_AT, 202275_AT, 213577_AT, 210950_S_AT, 201790_S_AT, 213562_S_AT, 205822_S_AT, 209146_AT, 203027_S_AT, 201275_AT, 216607_S_AT	376	85	13528	6.34919	0.000163219	2.7205e-05	0.000136473
GOTERM_MF_FAT	GO:0016564~transcription repressor activity	15	2.81426	0.0774478	203140_AT, 220266_S_AT, 201565_S_AT, 230821_AT, 209015_S_AT, 226267_AT, 226275_AT, 212614_AT, 204175_AT, 202863_AT, 223506_AT, 232383_AT, 202455_AT, 201170_S_AT, 213293_S_AT	378	316	12983	1.63037	1	0.838826	69.8669
GOTERM_MF_FAT	GO:0003779~actin binding	15	2.81426	0.0930737	216918_S_AT, 228494_AT, 204455_AT, 212233_AT, 200696_S_AT, 203563_AT, 214040_S_AT, 212327_AT, 219756_S_AT, 221042_S_AT, 203661_S_AT, 231251_AT, 225548_AT, 212325_AT, 205141_AT, 203453_AT, 1554026_A_AT, 218084_X_AT	378	326	12983	1.58036	1	0.838251	76.6307
GOTERM_BP_FAT	GO:0016126~sterol biosynthetic process	14	2.62664	3.94663e-12	208881_X_AT, 211423_S_AT, 214917_AT, 209218_AT, 204615_X_AT, 215649_S_AT, 202245_AT, 208647_AT, 202275_AT, 213577_AT, 210950_S_AT, 201790_S_AT, 213562_S_AT, 205822_S_AT, 209146_AT, 203027_S_AT, 201275_AT, 216607_S_AT	376	35	13528	14.3915	8.14583e-09	8.14583e-09	6.81046e-09
SP_PIR_KEYWORDS	duplication	14	2.62664	0.00896041	201302_AT, 208747_S_AT, 202357_S_AT, 200696_S_AT, 211911_X_AT, 214040_S_AT, 202068_S_AT, 212067_S_AT, 1555229_A_AT, 211799_X_AT, 200982_S_AT, 228727_AT, 208729_X_AT, 228648_AT, 214459_X_AT, 208812_X_AT, 204584_AT, 213258_AT, 201301_S_AT, 226189_AT, 212464_S_AT	518	228	19235	2.28011	0.981617	0.1991	11.9662
GOTERM_CC_FAT	GO:0005789~endoplasmic reticulum membrane	14	2.62664	0.0352415	223299_AT, 209218_AT, 210868_S_AT, 202436_S_AT, 202435_S_AT, 203718_AT, 202437_S_AT, 220081_X_AT, 208647_AT, 213577_AT, 220177_S_AT, 210950_S_AT, 214044_AT, 201790_S_AT, 213562_S_AT, 235168_AT, 209146_AT, 1558292_S_AT, 216607_S_AT	352	269	12782	1.88987	0.99999	0.535957	38.3918
GENETIC_ASSOCIATION_DB_DISEASE	colorectal cancer	14	2.62664	0.0412599	215125_S_AT, 214058_AT, 202436_S_AT, 215165_X_AT, 202435_S_AT, 202437_S_AT, 221577_X_AT, 201425_AT, 216598_S_AT, 211668_S_AT, 226929_AT, 200790_AT, 1553972_A_AT, 207126_X_AT, 204532_X_AT, 213275_X_AT, 239035_AT, 202967_AT, 236313_AT, 206094_X_AT, 202706_S_AT, 208596_S_AT	117	201	3028	1.80261	1	0.999547	47.2238
GOTERM_CC_FAT	GO:0042175~nuclear envelope-endoplasmic reticulum network	14	2.62664	0.0506218	223299_AT, 209218_AT, 210868_S_AT, 202436_S_AT, 202435_S_AT, 203718_AT, 202437_S_AT, 220081_X_AT, 208647_AT, 213577_AT, 220177_S_AT, 210950_S_AT, 214044_AT, 201790_S_AT, 213562_S_AT, 235168_AT, 209146_AT, 1558292_S_AT, 216607_S_AT	352	284	12782	1.79005	1	0.56559	50.408
GOTERM_MF_FAT	GO:0004857~enzyme inhibitor activity	14	2.62664	0.0518124	201302_AT, 231579_S_AT, 212268_AT, 41469_AT, 203021_AT, 217767_AT, 227697_AT, 1552701_A_AT, 201009_S_AT, 203167_AT, 202284_S_AT, 236313_AT, 209720_S_AT, 224560_AT, 201301_S_AT, 204614_AT, 213258_AT, 201010_S_AT, 201008_S_AT	378	270	12983	1.78093	1	0.799355	54.6923
SP_PIR_KEYWORDS	Steroid biosynthesis	13	2.43902	3.52766e-10	211423_S_AT, 208881_X_AT, 214917_AT, 204615_X_AT, 215649_S_AT, 202245_AT, 220081_X_AT, 208647_AT, 210950_S_AT, 201790_S_AT, 205822_S_AT, 209146_AT, 203027_S_AT, 201275_AT, 216607_S_AT	518	40	19235	12.0683	1.56628e-07	1.56628e-07	4.99508e-07
INTERPRO	IPR018114:Peptidase S1/S6, chymotrypsin/Hap, active site	13	2.43902	4.62191e-05	208747_S_AT, 218983_AT, 202357_S_AT, 212067_S_AT, 206125_S_AT, 1555229_A_AT, 220177_S_AT, 211668_S_AT, 204733_AT, 202458_AT, 209792_S_AT, 222242_S_AT, 202525_AT, 239381_AT, 205778_AT	478	105	16659	4.31494	0.0417197	0.0417197	0.0722443
SMART	SM00020:Tryp_SPc	13	2.43902	5.79008e-05	208747_S_AT, 218983_AT, 202357_S_AT, 212067_S_AT, 206125_S_AT, 1555229_A_AT, 220177_S_AT, 211668_S_AT, 204733_AT, 202458_AT, 209792_S_AT, 222242_S_AT, 202525_AT, 239381_AT, 205778_AT	243	116	9079	4.18714	0.0104829	0.0104829	0.0714273
INTERPRO	IPR001254:Peptidase S1 and S6, chymotrypsin/Hap	13	2.43902	0.00012267	208747_S_AT, 218983_AT, 202357_S_AT, 212067_S_AT, 206125_S_AT, 1555229_A_AT, 220177_S_AT, 211668_S_AT, 204733_AT, 202458_AT, 209792_S_AT, 222242_S_AT, 202525_AT, 239381_AT, 205778_AT	478	116	16659	3.90577	0.106946	0.0549848	0.191636
GOTERM_BP_FAT	GO:0070482~response to oxygen levels	13	2.43902	0.000553529	214917_AT, 204179_AT, 201425_AT, 227088_AT, 216598_S_AT, 211668_S_AT, 202022_AT, 214044_AT, 227697_AT, 202284_S_AT, 205141_AT, 202887_S_AT, 201243_S_AT	376	141	13528	3.31719	0.681075	0.0783858	0.950908
GOTERM_BP_FAT	GO:0046394~carboxylic acid biosynthetic process	13	2.43902	0.00127601	211423_S_AT, 200831_S_AT, 214917_AT, 210868_S_AT, 203343_AT, 218083_AT, 232560_AT, 217127_AT, 219205_AT, 204385_AT, 1553972_A_AT, 209146_AT, 222844_S_AT, 200832_S_AT, 207076_S_AT, 210663_S_AT, 217388_S_AT	376	155	13528	3.01757	0.928308	0.129514	2.17925
GOTERM_BP_FAT	GO:0016053~organic acid biosynthetic process	13	2.43902	0.00127601	211423_S_AT, 200831_S_AT, 214917_AT, 210868_S_AT, 203343_AT, 218083_AT, 232560_AT, 217127_AT, 219205_AT, 204385_AT, 1553972_A_AT, 209146_AT, 222844_S_AT, 200832_S_AT, 207076_S_AT, 210663_S_AT, 217388_S_AT	376	155	13528	3.01757	0.928308	0.129514	2.17925
GOTERM_BP_FAT	GO:0034470~ncRNA processing	13	2.43902	0.00596737	204133_AT, 210463_X_AT, 213310_AT, 201479_AT, 1554317_S_AT, 222047_S_AT, 218670_AT, 218914_AT, 218984_AT, 224966_S_AT, 204012_S_AT, 1556063_S_AT, 202212_AT	376	187	13528	2.50119	0.999996	0.36716	9.81292
UP_SEQ_FEATURE	active site:Proton donor	13	2.43902	0.0063998	209160_AT, 206561_S_AT, 202245_AT, 209699_X_AT, 202939_AT, 218923_AT, 227088_AT, 227103_S_AT, 211653_X_AT, 216594_X_AT, 204151_X_AT, 206574_S_AT, 205141_AT, 206632_S_AT, 202144_S_AT	515	194	19113	2.48693	0.999966	0.819706	10.1939
GOTERM_BP_FAT	GO:0051186~cofactor metabolic process	13	2.43902	0.00828229	215125_S_AT, 222074_AT, 210046_S_AT, 232560_AT, 202275_AT, 217127_AT, 201127_S_AT, 204385_AT, 1555037_A_AT, 224812_AT, 207126_X_AT, 204532_X_AT, 204437_S_AT, 210663_S_AT, 224522_S_AT, 217388_S_AT, 201193_AT, 206094_X_AT, 208596_S_AT, 205565_S_AT	376	195	13528	2.39858	1	0.435714	13.3695
GOTERM_BP_FAT	GO:0006631~fatty acid metabolic process	13	2.43902	0.009244	211423_S_AT, 200831_S_AT, 214917_AT, 210868_S_AT, 209160_AT, 203913_S_AT, 218083_AT, 209699_X_AT, 209522_S_AT, 220753_S_AT, 211653_X_AT, 200789_AT, 209146_AT, 200832_S_AT, 203914_X_AT, 223309_X_AT	376	198	13528	2.36224	1	0.461159	14.8078
SP_PIR_KEYWORDS	zymogen	13	2.43902	0.0100608	202357_S_AT, 206125_S_AT, 220177_S_AT, 219909_AT, 211668_S_AT, 239272_AT, 204733_AT, 227759_AT, 238012_AT, 202525_AT, 213275_X_AT, 200743_S_AT, 200742_S_AT, 239381_AT, 204279_AT, 205778_AT	518	206	19235	2.34336	0.988775	0.201069	13.3402
GOTERM_BP_FAT	GO:0042493~response to drug	13	2.43902	0.0174199	215125_S_AT, 214033_AT, 212233_AT, 1405_I_AT, 204655_AT, 202180_S_AT, 219205_AT, 216598_S_AT, 214044_AT, 204532_X_AT, 207126_X_AT, 205822_S_AT, 227697_AT, 202525_AT, 201009_S_AT, 222844_S_AT, 202284_S_AT, 1555759_A_AT, 206094_X_AT, 208596_S_AT, 201010_S_AT, 201008_S_AT	376	216	13528	2.16539	1	0.587151	26.1589
GOTERM_CC_FAT	GO:0005773~vacuole	13	2.43902	0.0461465	208926_AT, 208868_S_AT, 205613_AT, 229053_AT, 218923_AT, 223382_S_AT, 227759_AT, 209515_S_AT, 221697_AT, 208869_S_AT, 238012_AT, 213275_X_AT, 201667_AT, 200743_S_AT, 209114_AT, 200742_S_AT	352	252	12782	1.87326	1	0.549859	47.1572
UP_SEQ_FEATURE	domain:Peptidase S1	12	2.25141	0.000132841	208747_S_AT, 218983_AT, 202357_S_AT, 212067_S_AT, 206125_S_AT, 1555229_A_AT, 220177_S_AT, 211668_S_AT, 209792_S_AT, 204733_AT, 222242_S_AT, 202525_AT, 239381_AT, 205778_AT	515	106	19113	4.20143	0.191596	0.0684429	0.222228
INTERPRO	IPR001314:Peptidase S1A, chymotrypsin	12	2.25141	0.000191644	208747_S_AT, 218983_AT, 202357_S_AT, 212067_S_AT, 206125_S_AT, 1555229_A_AT, 220177_S_AT, 211668_S_AT, 209792_S_AT, 204733_AT, 222242_S_AT, 202525_AT, 239381_AT, 205778_AT	478	104	16659	4.02132	0.161979	0.0572029	0.299237
GOTERM_BP_FAT	GO:0007584~response to nutrient	12	2.25141	0.00178586	215125_S_AT, 220266_S_AT, 212233_AT, 202357_S_AT, 200696_S_AT, 39249_AT, 214040_S_AT, 216598_S_AT, 214044_AT, 204385_AT, 207126_X_AT, 204532_X_AT, 39248_AT, 201162_AT, 202863_AT, 210663_S_AT, 236313_AT, 217388_S_AT, 206094_X_AT, 208596_S_AT	376	140	13528	3.08389	0.975011	0.168451	3.03743
GOTERM_BP_FAT	GO:0042060~wound healing	12	2.25141	0.0175628	218901_AT, 200696_S_AT, 205613_AT, 214040_S_AT, 229053_AT, 211668_S_AT, 202430_S_AT, 209515_S_AT, 204733_AT, 208607_S_AT, 203058_S_AT, 203060_S_AT, 204614_AT, 213258_AT, 212464_S_AT	376	191	13528	2.26044	1	0.581364	26.3439
GOTERM_BP_FAT	GO:0010035~response to inorganic substance	12	2.25141	0.0278498	212233_AT, 204179_AT, 232560_AT, 200696_S_AT, 214040_S_AT, 39249_AT, 200632_S_AT, 228727_AT, 214044_AT, 222047_S_AT, 201009_S_AT, 39248_AT, 202284_S_AT, 201008_S_AT, 201010_S_AT, 205565_S_AT	376	205	13528	2.10607	1	0.688374	38.5783
GOTERM_BP_FAT	GO:0006916~anti-apoptosis	12	2.25141	0.0289391	201302_AT, 202643_S_AT, 206864_S_AT, 201042_AT, 224734_AT, 216598_S_AT, 227697_AT, 226543_AT, 206693_AT, 211475_S_AT, 204614_AT, 201301_S_AT, 202581_AT	376	206	13528	2.09585	1	0.681336	39.7553
GOTERM_CC_FAT	GO:0005792~microsome	12	2.25141	0.0633299	223299_AT, 215125_S_AT, 202869_AT, 209218_AT, 202436_S_AT, 205552_S_AT, 202435_S_AT, 202245_AT, 204972_AT, 202437_S_AT, 208647_AT, 209025_S_AT, 213577_AT, 210950_S_AT, 218746_AT, 204733_AT, 213562_S_AT, 1555427_S_AT, 207126_X_AT, 204532_X_AT, 216607_S_AT, 206094_X_AT, 208596_S_AT	352	237	12782	1.83861	1	0.598719	58.6575
GOTERM_CC_FAT	GO:0042598~vesicular fraction	12	2.25141	0.0746319	223299_AT, 215125_S_AT, 202869_AT, 209218_AT, 202436_S_AT, 205552_S_AT, 202435_S_AT, 202245_AT, 204972_AT, 202437_S_AT, 208647_AT, 209025_S_AT, 213577_AT, 210950_S_AT, 218746_AT, 204733_AT, 213562_S_AT, 1555427_S_AT, 207126_X_AT, 204532_X_AT, 216607_S_AT, 206094_X_AT, 208596_S_AT	352	244	12782	1.78586	1	0.630616	64.9072
SP_PIR_KEYWORDS	sterol biosynthesis	11	2.06379	4.10625e-10	211423_S_AT, 208881_X_AT, 214917_AT, 204615_X_AT, 215649_S_AT, 208647_AT, 210950_S_AT, 201790_S_AT, 205822_S_AT, 203027_S_AT, 209146_AT, 201275_AT, 216607_S_AT	518	25	19235	16.3386	1.82317e-07	9.11587e-08	5.81435e-07
GOTERM_BP_FAT	GO:0006695~cholesterol biosynthetic process	11	2.06379	8.50343e-10	208881_X_AT, 214917_AT, 204615_X_AT, 215649_S_AT, 202245_AT, 208647_AT, 202275_AT, 210950_S_AT, 201790_S_AT, 205822_S_AT, 203027_S_AT, 201275_AT, 216607_S_AT	376	26	13528	15.2218	1.75511e-06	5.85036e-07	1.46739e-06
GOTERM_BP_FAT	GO:0014070~response to organic cyclic substance	11	2.06379	0.00196174	211355_X_AT, 209894_AT, 201425_AT, 219205_AT, 202022_AT, 214044_AT, 200953_S_AT, 1555037_A_AT, 227697_AT, 201162_AT, 222844_S_AT, 202284_S_AT, 236313_AT, 201193_AT	376	121	13528	3.27079	0.98263	0.175518	3.33181
GOTERM_BP_FAT	GO:0001666~response to hypoxia	11	2.06379	0.0041238	214044_AT, 202022_AT, 214917_AT, 227697_AT, 204179_AT, 227088_AT, 205141_AT, 216598_S_AT, 202887_S_AT, 211668_S_AT, 201243_S_AT	376	134	13528	2.95348	0.999802	0.279668	6.88262
GOTERM_BP_FAT	GO:0032101~regulation of response to external stimulus	11	2.06379	0.0131862	203140_AT, 201042_AT, 1405_I_AT, 204655_AT, 217767_AT, 206125_S_AT, 211668_S_AT, 201531_AT, 1553994_AT, 208607_S_AT, 1555759_A_AT, 202831_AT, 1554008_AT	376	159	13528	2.48909	1	0.542867	20.4719
GOTERM_CC_FAT	GO:0045177~apical part of cell	11	2.06379	0.0260331	200982_S_AT, 214033_AT, 213275_X_AT, 222844_S_AT, 1552278_A_AT, 219205_AT, 225548_AT, 203453_AT, 209515_S_AT, 201243_S_AT, 208354_S_AT, 212464_S_AT	352	179	12782	2.23149	0.99979	0.536875	29.9615
GOTERM_BP_FAT	GO:0022613~ribonucleoprotein complex biogenesis	11	2.06379	0.0285258	204133_AT, 217786_AT, 201323_AT, 218914_AT, 201420_S_AT, 219031_S_AT, 201479_AT, 222666_S_AT, 209567_AT, 212766_S_AT, 1564521_X_AT, 202212_AT	376	180	13528	2.1987	1	0.682956	39.3112
GOTERM_MF_FAT	GO:0050662~coenzyme binding	11	2.06379	0.0385587	209218_AT, 210046_S_AT, 203913_S_AT, 203343_AT, 202275_AT, 213577_AT, 227094_AT, 202201_AT, 220753_S_AT, 213562_S_AT, 1555037_A_AT, 224812_AT, 203914_X_AT, 224966_S_AT, 201193_AT	378	181	12983	2.08736	1	0.78947	44.2968
GOTERM_BP_FAT	GO:0007398~ectoderm development	11	2.06379	0.0507494	207935_S_AT, 220266_S_AT, 209125_AT, 202345_S_AT, 204734_AT, 1555350_AT, 222242_S_AT, 201820_AT, 201009_S_AT, 205157_S_AT, 239381_AT, 205778_AT, 212236_X_AT, 201008_S_AT, 201010_S_AT	376	199	13528	1.98877	1	0.752435	59.2925
GOTERM_CC_FAT	GO:0000323~lytic vacuole	11	2.06379	0.0665569	208926_AT, 205613_AT, 229053_AT, 218923_AT, 223382_S_AT, 209515_S_AT, 227759_AT, 213275_X_AT, 238012_AT, 201667_AT, 209114_AT, 200743_S_AT, 200742_S_AT	352	211	12782	1.89307	1	0.601962	60.5396
GOTERM_CC_FAT	GO:0005764~lysosome	11	2.06379	0.0665569	208926_AT, 205613_AT, 229053_AT, 218923_AT, 223382_S_AT, 209515_S_AT, 227759_AT, 213275_X_AT, 238012_AT, 201667_AT, 209114_AT, 200743_S_AT, 200742_S_AT	352	211	12782	1.89307	1	0.601962	60.5396
SP_PIR_KEYWORDS	microsome	10	1.87617	0.00223317	223299_AT, 215125_S_AT, 202869_AT, 209218_AT, 202436_S_AT, 205552_S_AT, 202435_S_AT, 204972_AT, 202437_S_AT, 209025_S_AT, 213577_AT, 218746_AT, 204733_AT, 213562_S_AT, 1555427_S_AT, 207126_X_AT, 204532_X_AT, 216607_S_AT, 206094_X_AT, 208596_S_AT	518	106	19235	3.50313	0.629402	0.0601546	3.11607
GOTERM_BP_FAT	GO:0016485~protein processing	10	1.87617	0.00392251	208747_S_AT, 223299_AT, 218983_AT, 202357_S_AT, 217767_AT, 212067_S_AT, 1555229_A_AT, 227103_S_AT, 227759_AT, 205565_S_AT, 204733_AT	376	112	13528	3.21239	0.9997	0.277096	6.55729
SP_PIR_KEYWORDS	lyase	10	1.87617	0.00458985	202022_AT, 222074_AT, 200790_AT, 1553972_A_AT, 215165_X_AT, 202336_S_AT, 203027_S_AT, 232560_AT, 217127_AT, 202706_S_AT, 202144_S_AT	518	118	19235	3.14688	0.870307	0.113214	6.30645
GOTERM_BP_FAT	GO:0051604~protein maturation	10	1.87617	0.00684925	208747_S_AT, 223299_AT, 218983_AT, 202357_S_AT, 217767_AT, 212067_S_AT, 1555229_A_AT, 227103_S_AT, 227759_AT, 205565_S_AT, 204733_AT	376	122	13528	2.94908	0.999999	0.386856	11.1837
GOTERM_CC_FAT	GO:0016324~apical plasma membrane	10	1.87617	0.0110726	200982_S_AT, 214033_AT, 213275_X_AT, 1552278_A_AT, 225548_AT, 203453_AT, 209515_S_AT, 201243_S_AT, 208354_S_AT, 212464_S_AT	352	133	12782	2.73026	0.97196	0.327751	13.957
INTERPRO	IPR016040:NAD(P)-binding domain	10	1.87617	0.028789	224812_AT, 203343_AT, 203913_S_AT, 203914_X_AT, 220081_X_AT, 202275_AT, 202201_AT, 201127_S_AT, 208626_S_AT, 220753_S_AT, 239108_AT	478	150	16659	2.32343	1	0.965494	36.6665
SP_PIR_KEYWORDS	nad	10	1.87617	0.0697423	211423_S_AT, 224812_AT, 224701_AT, 209160_AT, 203343_AT, 203913_S_AT, 209146_AT, 203914_X_AT, 201425_AT, 220081_X_AT, 220753_S_AT	518	189	19235	1.96472	1	0.467078	64.0723
GOTERM_BP_FAT	GO:0008544~epidermis development	10	1.87617	0.0706735	207935_S_AT, 220266_S_AT, 202345_S_AT, 204734_AT, 1555350_AT, 222242_S_AT, 201820_AT, 201009_S_AT, 205157_S_AT, 239381_AT, 205778_AT, 212236_X_AT, 201008_S_AT, 201010_S_AT	376	184	13528	1.95537	1	0.803419	71.7708
SP_PIR_KEYWORDS	Cholesterol biosynthesis	9	1.68856	1.50311e-08	208881_X_AT, 201790_S_AT, 214917_AT, 204615_X_AT, 205822_S_AT, 215649_S_AT, 203027_S_AT, 201275_AT, 208647_AT, 216607_S_AT, 210950_S_AT	518	19	19235	17.5894	6.67378e-06	1.66845e-06	2.12836e-05
GOTERM_BP_FAT	GO:0031099~regeneration	9	1.68856	0.000618259	202022_AT, 227697_AT, 212233_AT, 200696_S_AT, 214040_S_AT, 202284_S_AT, 216598_S_AT, 211668_S_AT, 221805_AT, 204733_AT	376	69	13528	4.69288	0.720983	0.0815784	1.06155
GOTERM_BP_FAT	GO:0050727~regulation of inflammatory response	9	1.68856	0.00117888	201531_AT, 203140_AT, 1553994_AT, 201042_AT, 208607_S_AT, 204655_AT, 1405_I_AT, 217767_AT, 1555759_A_AT, 202831_AT, 1554008_AT	376	76	13528	4.26064	0.912371	0.133432	2.01495
GOTERM_CC_FAT	GO:0005777~peroxisome	9	1.68856	0.00738683	208881_X_AT, 1555037_A_AT, 204615_X_AT, 200789_AT, 215649_S_AT, 203027_S_AT, 203559_S_AT, 201193_AT, 209522_S_AT, 239108_AT, 223309_X_AT	352	103	12782	3.17294	0.907447	0.257325	9.52517
GOTERM_CC_FAT	GO:0042579~microbody	9	1.68856	0.00738683	208881_X_AT, 1555037_A_AT, 204615_X_AT, 200789_AT, 215649_S_AT, 203027_S_AT, 203559_S_AT, 201193_AT, 209522_S_AT, 239108_AT, 223309_X_AT	352	103	12782	3.17294	0.907447	0.257325	9.52517
SP_PIR_KEYWORDS	Isomerase	9	1.68856	0.0157822	208881_X_AT, 204615_X_AT, 200789_AT, 218670_AT, 202245_AT, 218083_AT, 222844_S_AT, 218984_AT, 201479_AT, 204517_AT, 219205_AT	518	120	19235	2.78499	0.999144	0.254946	20.1687
GOTERM_BP_FAT	GO:0042254~ribosome biogenesis	9	1.68856	0.0202119	204133_AT, 201323_AT, 218914_AT, 219031_S_AT, 201479_AT, 222666_S_AT, 209567_AT, 212766_S_AT, 202212_AT	376	122	13528	2.65417	1	0.599959	29.6972
UP_SEQ_FEATURE	region of interest:Substrate binding	9	1.68856	0.0243372	222074_AT, 1555037_A_AT, 1553994_AT, 203343_AT, 1552476_S_AT, 210046_S_AT, 208955_AT, 201193_AT, 205141_AT, 213988_S_AT	515	130	19113	2.56934	1	0.980641	33.8072
SP_PIR_KEYWORDS	helicase	9	1.68856	0.0284249	218986_S_AT, 1559039_AT, 219328_AT, 205763_S_AT, 239654_AT, 207746_AT, 201584_S_AT, 223849_S_AT, 228230_AT	518	134	19235	2.49402	0.999997	0.347395	33.5234
GOTERM_BP_FAT	GO:0030155~regulation of cell adhesion	9	1.68856	0.0369248	203140_AT, 201506_AT, 201042_AT, 208607_S_AT, 200696_S_AT, 214040_S_AT, 224847_AT, 204584_AT, 211248_S_AT, 218084_X_AT	376	137	13528	2.36357	1	0.708474	47.7564
GOTERM_BP_FAT	GO:0050878~regulation of body fluid levels	9	1.68856	0.0426021	209173_AT, 208607_S_AT, 218901_AT, 203058_S_AT, 209930_S_AT, 203060_S_AT, 202430_S_AT, 213258_AT, 211668_S_AT, 209515_S_AT	376	141	13528	2.29651	1	0.722989	52.8238
GOTERM_MF_FAT	GO:0004386~helicase activity	9	1.68856	0.051453	218986_S_AT, 1559039_AT, 219328_AT, 205763_S_AT, 239654_AT, 207746_AT, 201584_S_AT, 223849_S_AT, 228230_AT	378	140	12983	2.20799	1	0.812602	54.436
GOTERM_BP_FAT	GO:0046942~carboxylic acid transport	9	1.68856	0.052154	216594_X_AT, 203578_S_AT, 204437_S_AT, 204151_X_AT, 204087_S_AT, 1552278_A_AT, 206599_AT, 204588_S_AT, 210010_S_AT, 209641_S_AT	376	147	13528	2.20278	1	0.757648	60.3195
GOTERM_BP_FAT	GO:0009259~ribonucleotide metabolic process	9	1.68856	0.052154	214033_AT, 1553994_AT, 215165_X_AT, 212135_S_AT, 212136_AT, 201127_S_AT, 213106_AT, 213302_AT, 202706_S_AT, 201243_S_AT, 202144_S_AT	376	147	13528	2.20278	1	0.757648	60.3195
GOTERM_BP_FAT	GO:0015849~organic acid transport	9	1.68856	0.0538695	216594_X_AT, 203578_S_AT, 204437_S_AT, 204151_X_AT, 204087_S_AT, 1552278_A_AT, 206599_AT, 204588_S_AT, 210010_S_AT, 209641_S_AT	376	148	13528	2.1879	1	0.760373	61.5408
GOTERM_MF_FAT	GO:0004866~endopeptidase inhibitor activity	9	1.68856	0.0607657	231579_S_AT, 212268_AT, 41469_AT, 1552701_A_AT, 203021_AT, 203167_AT, 217767_AT, 209720_S_AT, 224560_AT, 213258_AT, 204614_AT	378	145	12983	2.13186	1	0.796039	60.6578
GOTERM_BP_FAT	GO:0006732~coenzyme metabolic process	9	1.68856	0.0629867	204385_AT, 1555037_A_AT, 224812_AT, 210046_S_AT, 204437_S_AT, 224522_S_AT, 202275_AT, 210663_S_AT, 217127_AT, 217388_S_AT, 201193_AT, 201127_S_AT	376	153	13528	2.1164	1	0.790155	67.4589
GOTERM_BP_FAT	GO:0043434~response to peptide hormone stimulus	9	1.68856	0.0649189	200953_S_AT, 201173_X_AT, 227697_AT, 212233_AT, 202525_AT, 210574_S_AT, 204655_AT, 1405_I_AT, 1555759_A_AT, 202455_AT, 227759_AT, 221805_AT	376	154	13528	2.10265	1	0.789154	68.5976
GOTERM_MF_FAT	GO:0030414~peptidase inhibitor activity	9	1.68856	0.0777413	231579_S_AT, 212268_AT, 41469_AT, 1552701_A_AT, 203021_AT, 203167_AT, 217767_AT, 209720_S_AT, 224560_AT, 213258_AT, 204614_AT	378	153	12983	2.02039	1	0.829545	70.0092
KEGG_PATHWAY	hsa00100:Steroid biosynthesis	8	1.50094	3.51095e-07	211423_S_AT, 201790_S_AT, 209218_AT, 213562_S_AT, 209146_AT, 202245_AT, 220081_X_AT, 208647_AT, 213577_AT, 216607_S_AT, 210950_S_AT	158	17	5085	15.1452	5.16097e-05	5.16097e-05	0.000417799
GOTERM_BP_FAT	GO:0033273~response to vitamin	8	1.50094	0.00227033	204385_AT, 220266_S_AT, 212233_AT, 39248_AT, 200696_S_AT, 201162_AT, 39249_AT, 214040_S_AT, 202863_AT, 210663_S_AT, 217388_S_AT, 216598_S_AT	376	66	13528	4.36106	0.990825	0.192038	3.84631
GOTERM_BP_FAT	GO:0051605~protein maturation by peptide bond cleavage	8	1.50094	0.0097987	208747_S_AT, 223299_AT, 218983_AT, 202357_S_AT, 217767_AT, 212067_S_AT, 1555229_A_AT, 227103_S_AT, 227759_AT	376	86	13528	3.34686	1	0.470135	15.6272
SP_PIR_KEYWORDS	homodimer	8	1.50094	0.010081	208747_S_AT, 1553994_AT, 203913_S_AT, 201275_AT, 203914_X_AT, 212067_S_AT, 1555229_A_AT, 202275_AT, 204664_AT, 210431_AT	518	89	19235	3.33782	0.988876	0.192831	13.3652
GENETIC_ASSOCIATION_DB_DISEASE	hepatitis C	8	1.50094	0.0176565	202869_AT, 205552_S_AT, 1405_I_AT, 204655_AT, 211911_X_AT, 202068_S_AT, 211799_X_AT, 206569_AT, 202086_AT, 216598_S_AT, 208729_X_AT, 214459_X_AT, 1555759_A_AT, 202411_AT, 208812_X_AT	117	71	3028	2.91609	0.999998	0.998513	23.6779
GOTERM_BP_FAT	GO:0007599~hemostasis	8	1.50094	0.0305174	208607_S_AT, 218901_AT, 203058_S_AT, 209930_S_AT, 203060_S_AT, 202430_S_AT, 213258_AT, 211668_S_AT, 209515_S_AT	376	108	13528	2.66509	1	0.680917	41.4228
GOTERM_BP_FAT	GO:0006790~sulfur metabolic process	8	1.50094	0.040816	226929_AT, 1555037_A_AT, 1553972_A_AT, 203058_S_AT, 202275_AT, 239035_AT, 212344_AT, 217127_AT, 203060_S_AT, 201193_AT, 201427_S_AT	376	115	13528	2.50287	1	0.728341	51.2817
GOTERM_MF_FAT	GO:0019842~vitamin binding	8	1.50094	0.0845028	204385_AT, 1553972_A_AT, 202336_S_AT, 222844_S_AT, 204437_S_AT, 1552278_A_AT, 210663_S_AT, 217127_AT, 219205_AT, 217388_S_AT, 227094_AT	378	130	12983	2.11363	1	0.845231	73.1198
GOTERM_BP_FAT	GO:0045087~innate immune response	8	1.50094	0.089316	208747_S_AT, 218983_AT, 204385_AT, 202357_S_AT, 217767_AT, 212067_S_AT, 202863_AT, 1555229_A_AT, 210663_S_AT, 217388_S_AT, 209515_S_AT	376	138	13528	2.08572	1	0.835482	80.101
GOTERM_BP_FAT	GO:0009150~purine ribonucleotide metabolic process	8	1.50094	0.089316	214033_AT, 1553994_AT, 212135_S_AT, 212136_AT, 201127_S_AT, 213106_AT, 213302_AT, 201243_S_AT, 202144_S_AT	376	138	13528	2.08572	1	0.835482	80.101
GOTERM_BP_FAT	GO:0006720~isoprenoid metabolic process	7	1.31332	0.00126283	208881_X_AT, 218217_AT, 204615_X_AT, 205822_S_AT, 215649_S_AT, 203027_S_AT, 201275_AT, 208647_AT, 210950_S_AT	376	44	13528	5.72389	0.926328	0.134888	2.15698
SP_PIR_KEYWORDS	ribosome biogenesis	7	1.31332	0.00172504	201323_AT, 219031_S_AT, 201479_AT, 222666_S_AT, 209567_AT, 212766_S_AT, 202212_AT	518	48	19235	5.41526	0.5354	0.0498214	2.41508
KEGG_PATHWAY	hsa00480:Glutathione metabolism	7	1.31332	0.00406744	200790_AT, 1555037_A_AT, 210046_S_AT, 202275_AT, 202967_AT, 202831_AT, 201193_AT, 201516_AT	158	50	5085	4.5057	0.450712	0.181032	4.73435
INTERPRO	IPR016060:Complement control module	7	1.31332	0.00563755	208747_S_AT, 218983_AT, 202357_S_AT, 212067_S_AT, 223632_S_AT, 1555229_A_AT, 227480_AT, 212464_S_AT	478	57	16659	4.28	0.994552	0.64743	8.46044
SP_PIR_KEYWORDS	trna processing	7	1.31332	0.00915771	218670_AT, 210463_X_AT, 218984_AT, 204012_S_AT, 224966_S_AT, 1554317_S_AT, 1556063_S_AT	518	67	19235	3.87959	0.983173	0.193448	12.214
KEGG_PATHWAY	hsa00980:Metabolism of xenobiotics by cytochrome P450	7	1.31332	0.00995611	215125_S_AT, 202436_S_AT, 209160_AT, 202435_S_AT, 202437_S_AT, 209699_X_AT, 205623_AT, 211653_X_AT, 216594_X_AT, 207126_X_AT, 204532_X_AT, 204151_X_AT, 202967_AT, 206094_X_AT, 208596_S_AT	158	60	5085	3.75475	0.770277	0.307689	11.2255
UP_SEQ_FEATURE	nucleotide phosphate-binding region:NADP	7	1.31332	0.0128559	216594_X_AT, 1555037_A_AT, 209160_AT, 206561_S_AT, 210046_S_AT, 209699_X_AT, 204151_X_AT, 202275_AT, 201193_AT, 211653_X_AT	515	72	19113	3.60817	1	0.948149	19.4816
UP_SEQ_FEATURE	nucleotide phosphate-binding region:NAD	7	1.31332	0.016458	224812_AT, 203343_AT, 203913_S_AT, 203914_X_AT, 205623_AT, 201425_AT, 220081_X_AT, 220753_S_AT	515	76	19113	3.41827	1	0.963885	24.263
SP_PIR_KEYWORDS	membrane protein	7	1.31332	0.0174165	216918_S_AT, 204455_AT, 211911_X_AT, 211799_X_AT, 208729_X_AT, 1553994_AT, 214459_X_AT, 212135_S_AT, 208812_X_AT, 212136_AT, 204664_AT, 210431_AT, 226189_AT	518	77	19235	3.37575	0.999591	0.268049	22.0253
GOTERM_BP_FAT	GO:0008033~tRNA processing	7	1.31332	0.018721	218670_AT, 210463_X_AT, 218984_AT, 204012_S_AT, 224966_S_AT, 1554317_S_AT, 1556063_S_AT	376	76	13528	3.31383	1	0.596318	27.8282
GOTERM_BP_FAT	GO:0006959~humoral immune response	7	1.31332	0.0222309	208747_S_AT, 218983_AT, 202357_S_AT, 217767_AT, 212067_S_AT, 206693_AT, 1555229_A_AT, 216598_S_AT	376	79	13528	3.18799	1	0.619669	32.1557
GOTERM_BP_FAT	GO:0019748~secondary metabolic process	7	1.31332	0.0222309	208881_X_AT, 202436_S_AT, 204615_X_AT, 202435_S_AT, 202437_S_AT, 202275_AT, 218217_AT, 1555037_A_AT, 204385_AT, 224812_AT, 210663_S_AT, 201193_AT, 217388_S_AT	376	79	13528	3.18799	1	0.619669	32.1557
GOTERM_BP_FAT	GO:0031960~response to corticosteroid stimulus	7	1.31332	0.0305237	215125_S_AT, 1405_I_AT, 204655_AT, 216598_S_AT, 221805_AT, 207126_X_AT, 204532_X_AT, 202525_AT, 201162_AT, 1555759_A_AT, 202284_S_AT, 206094_X_AT, 208596_S_AT	376	85	13528	2.96295	1	0.674535	41.4294
GOTERM_CC_FAT	GO:0048770~pigment granule	7	1.31332	0.0356051	200982_S_AT, 220613_S_AT, 228727_AT, 208748_S_AT, 208749_X_AT, 213275_X_AT, 200743_S_AT, 200742_S_AT, 209515_S_AT	352	89	12782	2.85604	0.999991	0.516814	38.7046
GOTERM_CC_FAT	GO:0042470~melanosome	7	1.31332	0.0356051	200982_S_AT, 220613_S_AT, 228727_AT, 208748_S_AT, 208749_X_AT, 213275_X_AT, 200743_S_AT, 200742_S_AT, 209515_S_AT	352	89	12782	2.85604	0.999991	0.516814	38.7046
SP_PIR_KEYWORDS	plasma	7	1.31332	0.0393398	208747_S_AT, 202357_S_AT, 228648_AT, 217767_AT, 212067_S_AT, 1555229_A_AT, 201427_S_AT, 212464_S_AT	518	93	19235	2.79497	1	0.398985	43.351
KEGG_PATHWAY	hsa04612:Antigen processing and presentation	7	1.31332	0.0422476	211538_S_AT, 221875_X_AT, 208729_X_AT, 206785_S_AT, 213275_X_AT, 211911_X_AT, 214459_X_AT, 211799_X_AT, 208812_X_AT, 221978_AT, 211529_X_AT, 202581_AT	158	83	5085	2.71427	0.998245	0.596059	40.1705
SMART	SM00179:EGF_CA	7	1.31332	0.0428475	208747_S_AT, 212822_AT, 201787_AT, 225911_AT, 213069_AT, 212067_S_AT, 202068_S_AT, 1555229_A_AT, 218825_AT	243	96	9079	2.72432	0.999654	0.929824	41.749
GOTERM_BP_FAT	GO:0002526~acute inflammatory response	7	1.31332	0.0547938	208747_S_AT, 218983_AT, 208607_S_AT, 202357_S_AT, 217767_AT, 212067_S_AT, 1555229_A_AT, 212464_S_AT	376	98	13528	2.56991	1	0.757905	62.184
INTERPRO	IPR018097:EGF-like calcium-binding, conserved site	7	1.31332	0.05746	208747_S_AT, 212822_AT, 201787_AT, 225911_AT, 213069_AT, 212067_S_AT, 202068_S_AT, 1555229_A_AT, 218825_AT	478	96	16659	2.54125	1	0.979702	60.3587
INTERPRO	IPR001881:EGF-like calcium-binding	7	1.31332	0.05746	208747_S_AT, 212822_AT, 201787_AT, 225911_AT, 213069_AT, 212067_S_AT, 202068_S_AT, 1555229_A_AT, 218825_AT	478	96	16659	2.54125	1	0.979702	60.3587
GOTERM_BP_FAT	GO:0048585~negative regulation of response to stimulus	7	1.31332	0.0593295	201531_AT, 203140_AT, 1553994_AT, 227697_AT, 208607_S_AT, 206125_S_AT, 202831_AT	376	100	13528	2.51851	1	0.781496	65.1962
INTERPRO	IPR000152:EGF-type aspartate/asparagine hydroxylation conserved site	7	1.31332	0.0598429	208747_S_AT, 212822_AT, 201787_AT, 225911_AT, 213069_AT, 212067_S_AT, 202068_S_AT, 1555229_A_AT, 218825_AT	478	97	16659	2.51505	1	0.95761	61.8971
SMART	SM00490:HELICc	7	1.31332	0.063608	218986_S_AT, 1559039_AT, 219328_AT, 205763_S_AT, 239654_AT, 207746_AT, 201584_S_AT	243	106	9079	2.46731	0.999994	0.775786	55.5592
GOTERM_BP_FAT	GO:0050817~coagulation	7	1.31332	0.0640827	208607_S_AT, 218901_AT, 203058_S_AT, 203060_S_AT, 202430_S_AT, 213258_AT, 211668_S_AT, 209515_S_AT	376	102	13528	2.46913	1	0.788462	68.1095
GOTERM_BP_FAT	GO:0007596~blood coagulation	7	1.31332	0.0640827	208607_S_AT, 218901_AT, 203058_S_AT, 203060_S_AT, 202430_S_AT, 213258_AT, 211668_S_AT, 209515_S_AT	376	102	13528	2.46913	1	0.788462	68.1095
SP_PIR_KEYWORDS	protease inhibitor	7	1.31332	0.0687102	212268_AT, 41469_AT, 1552701_A_AT, 203021_AT, 209720_S_AT, 213258_AT, 204614_AT	518	107	19235	2.42928	1	0.468537	63.5037
INTERPRO	IPR012335:Thioredoxin fold	7	1.31332	0.0699551	209173_AT, 206662_AT, 226543_AT, 218083_AT, 202967_AT, 202831_AT, 201312_S_AT	478	101	16659	2.41545	1	0.964679	67.8246
SMART	SM00487:DEXDc	7	1.31332	0.070816	218986_S_AT, 1559039_AT, 219328_AT, 205763_S_AT, 239654_AT, 207746_AT, 201584_S_AT	243	109	9079	2.3994	0.999998	0.773564	59.6012
GOTERM_BP_FAT	GO:0043627~response to estrogen stimulus	7	1.31332	0.0716208	200953_S_AT, 209604_S_AT, 211355_X_AT, 227697_AT, 212233_AT, 209894_AT, 201009_S_AT, 202068_S_AT, 201008_S_AT, 201010_S_AT	376	105	13528	2.39858	1	0.801028	72.2633
GOTERM_BP_FAT	GO:0045926~negative regulation of growth	7	1.31332	0.085267	203140_AT, 202284_S_AT, 206693_AT, 217127_AT, 204610_S_AT, 223227_AT, 205565_S_AT	376	110	13528	2.28956	1	0.826557	78.5178
GOTERM_BP_FAT	GO:0007568~aging	7	1.31332	0.085267	202022_AT, 227697_AT, 212593_S_AT, 200696_S_AT, 204655_AT, 1405_I_AT, 222844_S_AT, 214040_S_AT, 1555759_A_AT, 202997_S_AT, 219205_AT, 202998_S_AT	376	110	13528	2.28956	1	0.826557	78.5178
INTERPRO	IPR001650:DNA/RNA helicase, C-terminal	7	1.31332	0.0868573	218986_S_AT, 1559039_AT, 219328_AT, 205763_S_AT, 239654_AT, 207746_AT, 201584_S_AT	478	107	16659	2.28	1	0.977807	75.8467
INTERPRO	IPR014021:Helicase, superfamily 1 and 2, ATP-binding	7	1.31332	0.0868573	218986_S_AT, 1559039_AT, 219328_AT, 205763_S_AT, 239654_AT, 207746_AT, 201584_S_AT	478	107	16659	2.28	1	0.977807	75.8467
INTERPRO	IPR014001:DEAD-like helicase, N-terminal	7	1.31332	0.092948	218986_S_AT, 1559039_AT, 219328_AT, 205763_S_AT, 239654_AT, 207746_AT, 201584_S_AT	478	109	16659	2.23817	1	0.976429	78.2464
UP_SEQ_FEATURE	metal ion-binding site:Magnesium	7	1.31332	0.093023	208881_X_AT, 204615_X_AT, 222844_S_AT, 212135_S_AT, 212136_AT, 219205_AT, 201127_S_AT, 213106_AT, 204664_AT, 210431_AT	515	116	19113	2.23955	1	0.997551	80.5063
GOTERM_BP_FAT	GO:0008299~isoprenoid biosynthetic process	6	1.1257	0.000175199	208881_X_AT, 204615_X_AT, 205822_S_AT, 215649_S_AT, 203027_S_AT, 201275_AT, 208647_AT, 210950_S_AT	376	20	13528	10.7936	0.303468	0.0393858	0.3019
SP_PIR_KEYWORDS	acute phase	6	1.1257	0.000957818	208747_S_AT, 208607_S_AT, 202357_S_AT, 217767_AT, 212067_S_AT, 1555229_A_AT, 212464_S_AT	518	29	19235	7.68273	0.346541	0.0321991	1.34773
GOTERM_BP_FAT	GO:0009451~RNA modification	6	1.1257	0.0102681	218670_AT, 218914_AT, 225398_AT, 218984_AT, 201479_AT, 1554317_S_AT	376	48	13528	4.49734	1	0.475623	16.3147
SP_PIR_KEYWORDS	cyclin	6	1.1257	0.0107823	200953_S_AT, 202769_AT, 226466_S_AT, 202284_S_AT, 202770_S_AT, 224847_AT, 236313_AT	518	50	19235	4.45598	0.991879	0.196509	14.2303
GOTERM_MF_FAT	GO:0051287~NAD or NADH binding	6	1.1257	0.0113417	1555037_A_AT, 224812_AT, 203343_AT, 203913_S_AT, 210046_S_AT, 203914_X_AT, 201193_AT, 220753_S_AT	378	47	12983	4.38467	0.999277	0.426665	15.6112
KEGG_PATHWAY	hsa00140:Steroid hormone biosynthesis	6	1.1257	0.0130009	215125_S_AT, 202436_S_AT, 209160_AT, 202435_S_AT, 202437_S_AT, 209699_X_AT, 220081_X_AT, 211653_X_AT, 216594_X_AT, 207126_X_AT, 204532_X_AT, 204151_X_AT, 206094_X_AT, 208596_S_AT	158	46	5085	4.19785	0.853929	0.319367	14.4204
SP_PIR_KEYWORDS	serine proteinase	6	1.1257	0.0147546	208747_S_AT, 202357_S_AT, 238012_AT, 217767_AT, 212067_S_AT, 1555229_A_AT, 211668_S_AT	518	54	19235	4.12591	0.998639	0.249451	18.9803
GOTERM_BP_FAT	GO:0006518~peptide metabolic process	6	1.1257	0.015389	223299_AT, 1555037_A_AT, 202336_S_AT, 202275_AT, 200743_S_AT, 217127_AT, 200742_S_AT, 201193_AT	376	53	13528	4.07306	1	0.559906	23.4805
GENETIC_ASSOCIATION_DB_DISEASE	hepatitis B	6	1.1257	0.0227722	202869_AT, 205552_S_AT, 204972_AT, 1405_I_AT, 204655_AT, 211911_X_AT, 211799_X_AT, 202086_AT, 208729_X_AT, 214459_X_AT, 1555759_A_AT, 208812_X_AT, 204279_AT	117	43	3028	3.61121	1	0.99635	29.4892
KEGG_PATHWAY	hsa00330:Arginine and proline metabolism	6	1.1257	0.0229271	200790_AT, 203559_S_AT, 207076_S_AT, 201425_AT, 201516_AT, 213988_S_AT	158	53	5085	3.64342	0.966943	0.433485	24.1192
SP_PIR_KEYWORDS	Antiviral defense	6	1.1257	0.0253957	203882_AT, 208436_S_AT, 202086_AT, 225682_S_AT, 202430_S_AT, 213293_S_AT	518	62	19235	3.59354	0.999989	0.334957	30.5276
UP_SEQ_FEATURE	region of interest:Linker 12	6	1.1257	0.0287181	204734_AT, 207935_S_AT, 201820_AT, 205157_S_AT, 209125_AT, 212236_X_AT, 221805_AT	515	64	19113	3.47931	1	0.979505	38.6125
GOTERM_BP_FAT	GO:0010243~response to organic nitrogen	6	1.1257	0.0301847	202022_AT, 205822_S_AT, 232560_AT, 202284_S_AT, 216598_S_AT, 221805_AT	376	63	13528	3.42655	1	0.683426	41.075
INTERPRO	IPR011545:DNA/RNA helicase, DEAD/DEAH box type, N-terminal	6	1.1257	0.0302039	218986_S_AT, 1559039_AT, 219328_AT, 205763_S_AT, 207746_AT, 201584_S_AT	478	61	16659	3.42801	1	0.9568	38.0938
SP_PIR_KEYWORDS	multifunctional enzyme	6	1.1257	0.0400013	215165_X_AT, 202336_S_AT, 203058_S_AT, 208647_AT, 203060_S_AT, 227103_S_AT, 202201_AT, 210950_S_AT, 202706_S_AT	518	70	19235	3.18285	1	0.395581	43.9008
UP_SEQ_FEATURE	region of interest:Linker 1	6	1.1257	0.0400777	204734_AT, 207935_S_AT, 201820_AT, 205157_S_AT, 209125_AT, 212236_X_AT, 221805_AT	515	70	19113	3.18108	1	0.990698	49.5896
UP_SEQ_FEATURE	region of interest:Coil 1B	6	1.1257	0.0400777	204734_AT, 207935_S_AT, 201820_AT, 205157_S_AT, 209125_AT, 212236_X_AT, 221805_AT	515	70	19113	3.18108	1	0.990698	49.5896
UP_SEQ_FEATURE	region of interest:Coil 1A	6	1.1257	0.0400777	204734_AT, 207935_S_AT, 201820_AT, 205157_S_AT, 209125_AT, 212236_X_AT, 221805_AT	515	70	19113	3.18108	1	0.990698	49.5896
UP_SEQ_FEATURE	region of interest:Rod	6	1.1257	0.042201	204734_AT, 207935_S_AT, 201820_AT, 205157_S_AT, 209125_AT, 212236_X_AT, 221805_AT	515	71	19113	3.13628	1	0.989969	51.4248
PIR_SUPERFAMILY	PIRSF002282:cytoskeletal keratin	6	1.1257	0.0424072	204734_AT, 207935_S_AT, 201820_AT, 205157_S_AT, 209125_AT, 212236_X_AT, 221805_AT	234	61	7396	3.10887	0.999992	0.980333	43.4699
UP_SEQ_FEATURE	region of interest:Head	6	1.1257	0.0466477	204734_AT, 207935_S_AT, 201820_AT, 205157_S_AT, 209125_AT, 212236_X_AT, 221805_AT	515	73	19113	3.05035	1	0.988879	55.0664
UP_SEQ_FEATURE	region of interest:Tail	6	1.1257	0.0513624	204734_AT, 207935_S_AT, 201820_AT, 205157_S_AT, 209125_AT, 212236_X_AT, 221805_AT	515	75	19113	2.96901	1	0.98824	58.6462
INTERPRO	IPR018039:Intermediate filament protein, conserved site	6	1.1257	0.0552842	204734_AT, 207935_S_AT, 201820_AT, 205157_S_AT, 209125_AT, 212236_X_AT, 221805_AT	478	72	16659	2.90429	1	0.987344	58.9034
INTERPRO	IPR013091:EGF calcium-binding	6	1.1257	0.0552842	212822_AT, 201787_AT, 225911_AT, 213069_AT, 212067_S_AT, 202068_S_AT, 218825_AT	478	72	16659	2.90429	1	0.987344	58.9034
INTERPRO	IPR016044:Filament	6	1.1257	0.0552842	204734_AT, 207935_S_AT, 201820_AT, 205157_S_AT, 209125_AT, 212236_X_AT, 221805_AT	478	72	16659	2.90429	1	0.987344	58.9034
INTERPRO	IPR001664:Intermediate filament protein	6	1.1257	0.0580194	204734_AT, 207935_S_AT, 201820_AT, 205157_S_AT, 209125_AT, 212236_X_AT, 221805_AT	478	73	16659	2.8645	1	0.968072	60.725
SP_PIR_KEYWORDS	innate immunity	6	1.1257	0.0588305	208747_S_AT, 218983_AT, 202357_S_AT, 217767_AT, 212067_S_AT, 1555229_A_AT, 225682_S_AT	518	78	19235	2.8564	1	0.450219	57.6218
SP_PIR_KEYWORDS	Intermediate filament	6	1.1257	0.0588305	204734_AT, 207935_S_AT, 201820_AT, 205157_S_AT, 209125_AT, 212236_X_AT, 221805_AT	518	78	19235	2.8564	1	0.450219	57.6218
KEGG_PATHWAY	hsa04610:Complement and coagulation cascades	6	1.1257	0.060895	208747_S_AT, 202357_S_AT, 217767_AT, 212067_S_AT, 1555229_A_AT, 213258_AT, 211668_S_AT	158	69	5085	2.79857	0.999903	0.568121	52.6521
GOTERM_BP_FAT	GO:0046700~heterocycle catabolic process	6	1.1257	0.0623693	215125_S_AT, 214033_AT, 204385_AT, 204532_X_AT, 207126_X_AT, 1553994_AT, 210663_S_AT, 227088_AT, 217388_S_AT, 201127_S_AT, 206094_X_AT, 208596_S_AT	376	77	13528	2.80354	1	0.794514	67.0869
GOTERM_MF_FAT	GO:0005200~structural constituent of cytoskeleton	6	1.1257	0.063699	204734_AT, 222473_S_AT, 201820_AT, 205157_S_AT, 209125_AT, 212236_X_AT, 221805_AT	378	74	12983	2.78486	1	0.786797	62.447
SP_PIR_KEYWORDS	Serine protease inhibitor	6	1.1257	0.0642078	212268_AT, 41469_AT, 203021_AT, 209720_S_AT, 213258_AT, 204614_AT	518	80	19235	2.78499	1	0.458735	60.9242
GOTERM_BP_FAT	GO:0051384~response to glucocorticoid stimulus	6	1.1257	0.0652018	215125_S_AT, 204532_X_AT, 207126_X_AT, 204655_AT, 1405_I_AT, 201162_AT, 202284_S_AT, 1555759_A_AT, 216598_S_AT, 206094_X_AT, 221805_AT, 208596_S_AT	376	78	13528	2.76759	1	0.786959	68.7612
GOTERM_BP_FAT	GO:0006633~fatty acid biosynthetic process	6	1.1257	0.0681052	211423_S_AT, 200831_S_AT, 214917_AT, 210868_S_AT, 209146_AT, 218083_AT, 200832_S_AT	376	79	13528	2.73256	1	0.79807	70.3939
GOTERM_BP_FAT	GO:0034097~response to cytokine stimulus	6	1.1257	0.0681052	204385_AT, 227697_AT, 204655_AT, 1405_I_AT, 202863_AT, 1555759_A_AT, 210663_S_AT, 236313_AT, 1554008_AT, 217388_S_AT	376	79	13528	2.73256	1	0.79807	70.3939
GOTERM_BP_FAT	GO:0009309~amine biosynthetic process	6	1.1257	0.0741239	200790_AT, 1553972_A_AT, 222844_S_AT, 207076_S_AT, 217127_AT, 219205_AT, 201516_AT	376	81	13528	2.66509	1	0.805777	73.5259
SP_PIR_KEYWORDS	peroxisome	6	1.1257	0.0950441	208881_X_AT, 1555037_A_AT, 204615_X_AT, 200789_AT, 215649_S_AT, 201193_AT, 209522_S_AT, 239108_AT	518	90	19235	2.47555	1	0.540643	75.6861
KEGG_PATHWAY	hsa00900:Terpenoid backbone biosynthesis	5	0.938086	0.00091493	208881_X_AT, 204615_X_AT, 205822_S_AT, 215649_S_AT, 203027_S_AT, 201275_AT	158	15	5085	10.7278	0.125896	0.0650649	1.08335
GOTERM_MF_FAT	GO:0016628~oxidoreductase activity, acting on the CH-CH group of donors, NAD or NADP as acceptor	5	0.938086	0.00191868	216594_X_AT, 201790_S_AT, 209160_AT, 209699_X_AT, 204151_X_AT, 202201_AT, 211653_X_AT	378	19	12983	9.03857	0.704064	0.159657	2.81741
GOTERM_MF_FAT	GO:0016866~intramolecular transferase activity	5	0.938086	0.00630651	218670_AT, 202245_AT, 225398_AT, 218984_AT, 201479_AT	378	26	12983	6.60511	0.981885	0.30555	8.98465
BIOCARTA	h_cellcyclePathway:Cyclins and Cell Cycle Regulation	5	0.938086	0.0190342	200953_S_AT, 242538_AT, 202284_S_AT, 224847_AT, 236313_AT	62	25	1437	4.63548	0.856438	0.856438	19.2412
GOTERM_BP_FAT	GO:0051262~protein tetramerization	5	0.938086	0.0222651	202022_AT, 222844_S_AT, 204565_AT, 217127_AT, 219205_AT, 202144_S_AT	376	39	13528	4.61266	1	0.612663	32.1967
GOTERM_BP_FAT	GO:0033189~response to vitamin A	5	0.938086	0.0284137	220266_S_AT, 212233_AT, 39248_AT, 201162_AT, 39249_AT, 202863_AT	376	42	13528	4.28318	1	0.688568	39.1903
GOTERM_BP_FAT	GO:0006956~complement activation	5	0.938086	0.0284137	208747_S_AT, 218983_AT, 202357_S_AT, 217767_AT, 212067_S_AT, 1555229_A_AT	376	42	13528	4.28318	1	0.688568	39.1903
GOTERM_BP_FAT	GO:0002541~activation of plasma proteins involved in acute inflammatory response	5	0.938086	0.0306656	208747_S_AT, 218983_AT, 202357_S_AT, 217767_AT, 212067_S_AT, 1555229_A_AT	376	43	13528	4.18357	1	0.669899	41.5772
COG_ONTOLOGY	Amino acid transport and metabolism	5	0.938086	0.0417745	200790_AT, 203578_S_AT, 222844_S_AT, 207076_S_AT, 219205_AT, 204588_S_AT	54	49	1950	3.68481	0.555485	0.33328	27.3708
SMART	SM00042:CUB	5	0.938086	0.0463758	208747_S_AT, 218983_AT, 231861_AT, 212067_S_AT, 1555229_A_AT, 219304_S_AT, 201412_AT	243	51	9079	3.66295	0.999824	0.884743	44.3441
SMART	SM00356:ZnF_C3H1	5	0.938086	0.0492314	201531_AT, 213063_AT, 210463_X_AT, 223506_AT, 224966_S_AT	243	52	9079	3.59251	0.999898	0.840807	46.3661
GOTERM_BP_FAT	GO:0032102~negative regulation of response to external stimulus	5	0.938086	0.049309	201531_AT, 1553994_AT, 208607_S_AT, 206125_S_AT, 202831_AT	376	50	13528	3.59787	1	0.751319	58.2134
GOTERM_MF_FAT	GO:0016765~transferase activity, transferring alkyl or aryl (other than methyl) groups	5	0.938086	0.0532969	206079_AT, 201275_AT, 208647_AT, 202967_AT, 210950_S_AT, 201516_AT	378	49	12983	3.50475	1	0.793688	55.7364
INTERPRO	IPR000859:CUB	5	0.938086	0.057769	208747_S_AT, 218983_AT, 231861_AT, 212067_S_AT, 1555229_A_AT, 219304_S_AT, 201412_AT	478	51	16659	3.41681	1	0.974205	60.5614
INTERPRO	IPR000571:Zinc finger, CCCH-type	5	0.938086	0.0612306	201531_AT, 213063_AT, 210463_X_AT, 223506_AT, 224966_S_AT	478	52	16659	3.3511	1	0.9534	62.767
SMART	SM00032:CCP	5	0.938086	0.0615989	208747_S_AT, 202357_S_AT, 212067_S_AT, 223632_S_AT, 1555229_A_AT, 227480_AT	243	56	9079	3.33591	0.999991	0.80853	54.3681
SP_PIR_KEYWORDS	sushi	5	0.938086	0.0634376	208747_S_AT, 202357_S_AT, 212067_S_AT, 223632_S_AT, 1555229_A_AT, 227480_AT	518	56	19235	3.31546	1	0.46159	60.4664
UP_SEQ_FEATURE	domain:EGF-like 2; calcium-binding	5	0.938086	0.0669477	212822_AT, 201787_AT, 225911_AT, 213069_AT, 202068_S_AT, 218825_AT	515	57	19113	3.25549	1	0.993544	68.6645
GOTERM_BP_FAT	GO:0043603~cellular amide metabolic process	5	0.938086	0.0692832	204385_AT, 1555037_A_AT, 224812_AT, 207076_S_AT, 202275_AT, 210663_S_AT, 217388_S_AT, 201193_AT	376	56	13528	3.21239	1	0.800277	71.0331
SP_PIR_KEYWORDS	liver	5	0.938086	0.0739344	201425_AT, 208647_AT, 202831_AT, 216607_S_AT, 201427_S_AT, 210950_S_AT	518	59	19235	3.14688	1	0.480995	66.298
INTERPRO	IPR000436:Sushi/SCR/CCP	5	0.938086	0.0761405	208747_S_AT, 202357_S_AT, 212067_S_AT, 223632_S_AT, 1555229_A_AT, 227480_AT	478	56	16659	3.11174	1	0.969102	71.0126
GOTERM_BP_FAT	GO:0045785~positive regulation of cell adhesion	5	0.938086	0.0845781	201042_AT, 208607_S_AT, 224847_AT, 204584_AT, 211248_S_AT	376	60	13528	2.99823	1	0.826887	78.2369
SP_PIR_KEYWORDS	pyridoxal phosphate	5	0.938086	0.0852513	200790_AT, 204385_AT, 1553972_A_AT, 222844_S_AT, 210663_S_AT, 217127_AT, 219205_AT, 217388_S_AT	518	62	19235	2.99461	1	0.519366	71.6833
GENETIC_ASSOCIATION_DB_DISEASE	lymphoma	5	0.938086	0.0914759	226929_AT, 203140_AT, 208729_X_AT, 211355_X_AT, 209894_AT, 211911_X_AT, 214459_X_AT, 202284_S_AT, 211799_X_AT, 239035_AT, 208812_X_AT	117	45	3028	2.87559	1	0.999844	76.663
GOTERM_MF_FAT	GO:0005178~integrin binding	5	0.938086	0.0918422	216918_S_AT, 231579_S_AT, 204455_AT, 222473_S_AT, 201506_AT, 203167_AT, 224560_AT, 204584_AT	378	59	12983	2.91073	1	0.842895	76.1541
UP_SEQ_FEATURE	region of interest:Coil 2	5	0.938086	0.0933751	204734_AT, 207935_S_AT, 201820_AT, 205157_S_AT, 209125_AT, 212236_X_AT	515	64	19113	2.89942	1	0.99701	80.6327
SP_PIR_KEYWORDS	transcription factor	5	0.938086	0.0973578	242538_AT, 203882_AT, 209505_AT, 221530_S_AT, 209930_S_AT	518	65	19235	2.8564	1	0.543475	76.5517
INTERPRO	IPR018170:Aldo/keto reductase, conserved site	4	0.750469	0.0032423	216594_X_AT, 209160_AT, 206561_S_AT, 209699_X_AT, 204151_X_AT, 211653_X_AT	478	11	16659	12.6733	0.949926	0.526954	4.95116
UP_SEQ_FEATURE	site:Lowers pKa of active site Tyr	4	0.750469	0.00354894	216594_X_AT, 209160_AT, 206561_S_AT, 209699_X_AT, 204151_X_AT, 211653_X_AT	515	12	19113	12.3709	0.996627	0.679666	5.77996
GOTERM_MF_FAT	GO:0009982~pseudouridine synthase activity	4	0.750469	0.00439601	218670_AT, 225398_AT, 218984_AT, 201479_AT	378	12	12983	11.4489	0.938776	0.266815	6.34568
GOTERM_BP_FAT	GO:0001522~pseudouridine synthesis	4	0.750469	0.00612658	218670_AT, 225398_AT, 218984_AT, 201479_AT	376	14	13528	10.2796	0.999997	0.364285	10.0619
GOTERM_MF_FAT	GO:0004033~aldo-keto reductase activity	4	0.750469	0.00852314	216594_X_AT, 209160_AT, 206561_S_AT, 205623_AT, 204151_X_AT	378	15	12983	9.15908	0.995603	0.363796	11.9595
GOTERM_BP_FAT	GO:0002474~antigen processing and presentation of peptide antigen via MHC class I	4	0.750469	0.0107628	221875_X_AT, 208729_X_AT, 211911_X_AT, 214459_X_AT, 211799_X_AT, 208812_X_AT, 221978_AT, 211529_X_AT, 218746_AT	376	17	13528	8.46558	1	0.481546	17.0335
INTERPRO	IPR001395:Aldo/keto reductase	4	0.750469	0.011763	216594_X_AT, 209160_AT, 206561_S_AT, 209699_X_AT, 204151_X_AT, 211653_X_AT	478	17	16659	8.20034	0.999982	0.837699	16.8911
GOTERM_BP_FAT	GO:0006693~prostaglandin metabolic process	4	0.750469	0.0147232	209160_AT, 203913_S_AT, 218083_AT, 209699_X_AT, 203914_X_AT, 211653_X_AT	376	19	13528	7.57447	1	0.553202	22.5827
GOTERM_BP_FAT	GO:0006692~prostanoid metabolic process	4	0.750469	0.0147232	209160_AT, 203913_S_AT, 218083_AT, 209699_X_AT, 203914_X_AT, 211653_X_AT	376	19	13528	7.57447	1	0.553202	22.5827
GOTERM_BP_FAT	GO:0045104~intermediate filament cytoskeleton organization	4	0.750469	0.0169721	216918_S_AT, 204455_AT, 222473_S_AT, 209015_S_AT, 221805_AT	376	20	13528	7.19574	1	0.586574	25.576
GOTERM_BP_FAT	GO:0032570~response to progesterone stimulus	4	0.750469	0.0169721	227697_AT, 201009_S_AT, 201425_AT, 216598_S_AT, 201008_S_AT, 201010_S_AT	376	20	13528	7.19574	1	0.586574	25.576
GOTERM_BP_FAT	GO:0045103~intermediate filament-based process	4	0.750469	0.0220138	216918_S_AT, 204455_AT, 222473_S_AT, 209015_S_AT, 221805_AT	376	22	13528	6.54159	1	0.623762	31.8953
SP_PIR_KEYWORDS	amyloid	4	0.750469	0.0286289	201506_AT, 208607_S_AT, 200696_S_AT, 214040_S_AT, 202286_S_AT	518	25	19235	5.94131	0.999997	0.340336	33.7208
GOTERM_BP_FAT	GO:0009161~ribonucleoside monophosphate metabolic process	4	0.750469	0.0309399	1553994_AT, 215165_X_AT, 213302_AT, 202706_S_AT, 202144_S_AT	376	25	13528	5.7566	1	0.660794	41.8618
SP_PIR_KEYWORDS	heparin binding	4	0.750469	0.0317342	201427_S_AT, 213258_AT, 205014_AT, 212464_S_AT	518	26	19235	5.7128	0.999999	0.360744	36.6588
BIOCARTA	h_compPathway:Complement Pathway	4	0.750469	0.0323651	208747_S_AT, 202357_S_AT, 217767_AT, 212067_S_AT, 1555229_A_AT	62	17	1437	5.45351	0.963954	0.810141	30.6398
GOTERM_BP_FAT	GO:0051289~protein homotetramerization	4	0.750469	0.0342766	202022_AT, 222844_S_AT, 204565_AT, 217127_AT, 219205_AT	376	26	13528	5.53519	1	0.692761	45.2212
GOTERM_BP_FAT	GO:0031100~organ regeneration	4	0.750469	0.0342766	202022_AT, 227697_AT, 202284_S_AT, 216598_S_AT	376	26	13528	5.53519	1	0.692761	45.2212
UP_SEQ_FEATURE	binding site:NADP	4	0.750469	0.0385014	1555037_A_AT, 206561_S_AT, 210046_S_AT, 202275_AT, 201193_AT	515	28	19113	5.3018	1	0.992056	48.1853
GOTERM_BP_FAT	GO:0006081~cellular aldehyde metabolic process	4	0.750469	0.0414835	1555037_A_AT, 206561_S_AT, 210046_S_AT, 205623_AT, 201193_AT	376	28	13528	5.13982	1	0.728882	51.8635
GOTERM_BP_FAT	GO:0048002~antigen processing and presentation of peptide antigen	4	0.750469	0.0414835	221875_X_AT, 208729_X_AT, 211911_X_AT, 214459_X_AT, 211799_X_AT, 208812_X_AT, 221978_AT, 211529_X_AT, 218746_AT	376	28	13528	5.13982	1	0.728882	51.8635
SP_PIR_KEYWORDS	complement pathway	4	0.750469	0.0420567	208747_S_AT, 218983_AT, 217767_AT, 212067_S_AT, 1555229_A_AT	518	29	19235	5.12182	1	0.402858	45.5778
GOTERM_MF_FAT	GO:0033764~steroid dehydrogenase activity, acting on the CH-OH group of donors, NAD or NADP as acceptor	4	0.750469	0.0424454	216594_X_AT, 209160_AT, 209699_X_AT, 204151_X_AT, 220081_X_AT, 211653_X_AT	378	27	12983	5.08838	1	0.801614	47.5553
KEGG_PATHWAY	hsa00450:Selenoamino acid metabolism	4	0.750469	0.0446478	1553972_A_AT, 203058_S_AT, 217127_AT, 204012_S_AT, 203060_S_AT	158	26	5085	4.95131	0.998787	0.56798	41.9306
INTERPRO	IPR016160:Aldehyde dehydrogenase, conserved site	4	0.750469	0.0449991	232560_AT, 205623_AT, 201425_AT, 212464_S_AT	478	28	16659	4.97878	1	0.978916	51.3216
GOTERM_BP_FAT	GO:0006958~complement activation, classical pathway	4	0.750469	0.0453496	208747_S_AT, 218983_AT, 217767_AT, 212067_S_AT, 1555229_A_AT	376	29	13528	4.96258	1	0.730772	55.1063
GOTERM_BP_FAT	GO:0033013~tetrapyrrole metabolic process	4	0.750469	0.0453496	215125_S_AT, 222074_AT, 204532_X_AT, 207126_X_AT, 232560_AT, 206094_X_AT, 208596_S_AT, 205565_S_AT	376	29	13528	4.96258	1	0.730772	55.1063
GOTERM_BP_FAT	GO:0006778~porphyrin metabolic process	4	0.750469	0.0453496	215125_S_AT, 222074_AT, 204532_X_AT, 207126_X_AT, 232560_AT, 206094_X_AT, 208596_S_AT, 205565_S_AT	376	29	13528	4.96258	1	0.730772	55.1063
SP_PIR_KEYWORDS	homotetramer	4	0.750469	0.0458271	207076_S_AT, 201425_AT, 202275_AT, 202831_AT	518	30	19235	4.95109	1	0.421959	48.5335
UP_SEQ_FEATURE	zinc finger region:C3H1-type 1	4	0.750469	0.0458878	201531_AT, 213063_AT, 223506_AT, 224966_S_AT	515	30	19113	4.94835	1	0.990908	54.4628
UP_SEQ_FEATURE	zinc finger region:C3H1-type 2	4	0.750469	0.0458878	201531_AT, 213063_AT, 223506_AT, 224966_S_AT	515	30	19113	4.94835	1	0.990908	54.4628
GOTERM_BP_FAT	GO:0050729~positive regulation of inflammatory response	4	0.750469	0.0493877	201042_AT, 204655_AT, 1405_I_AT, 217767_AT, 1555759_A_AT, 1554008_AT	376	30	13528	4.79716	1	0.747292	58.273
SP_PIR_KEYWORDS	cell cycle control	4	0.750469	0.0497587	200953_S_AT, 212331_AT, 224847_AT, 236313_AT	518	31	19235	4.79138	1	0.424617	51.4563
GOTERM_MF_FAT	GO:0016831~carboxy-lyase activity	4	0.750469	0.0508396	222074_AT, 200790_AT, 215165_X_AT, 203027_S_AT, 202706_S_AT	378	29	12983	4.73746	1	0.824669	53.9956
GOTERM_BP_FAT	GO:0002455~humoral immune response mediated by circulating immunoglobulin	4	0.750469	0.053595	208747_S_AT, 218983_AT, 217767_AT, 212067_S_AT, 1555229_A_AT	376	31	13528	4.64242	1	0.762877	61.3478
GOTERM_BP_FAT	GO:0050728~negative regulation of inflammatory response	4	0.750469	0.053595	201531_AT, 1553994_AT, 208607_S_AT, 202831_AT	376	31	13528	4.64242	1	0.762877	61.3478
KEGG_PATHWAY	hsa00340:Histidine metabolism	4	0.750469	0.0587128	203559_S_AT, 205623_AT, 201425_AT, 204012_S_AT	158	29	5085	4.43911	0.999863	0.627784	51.3261
GOTERM_MF_FAT	GO:0016229~steroid dehydrogenase activity	4	0.750469	0.0599727	216594_X_AT, 209160_AT, 209699_X_AT, 204151_X_AT, 220081_X_AT, 211653_X_AT	378	31	12983	4.43181	1	0.804809	60.1606
GOTERM_BP_FAT	GO:0032526~response to retinoic acid	4	0.750469	0.062505	220266_S_AT, 39248_AT, 201162_AT, 39249_AT, 202863_AT	376	33	13528	4.36106	1	0.791388	67.169
GOTERM_BP_FAT	GO:0006195~purine nucleotide catabolic process	4	0.750469	0.062505	214033_AT, 1553994_AT, 227088_AT, 201127_S_AT	376	33	13528	4.36106	1	0.791388	67.169
GOTERM_BP_FAT	GO:0031348~negative regulation of defense response	4	0.750469	0.0770572	201531_AT, 1553994_AT, 208607_S_AT, 202831_AT	376	36	13528	3.99764	1	0.81527	74.9366
KEGG_PATHWAY	hsa00860:Porphyrin and chlorophyll metabolism	4	0.750469	0.0802758	215125_S_AT, 222074_AT, 204532_X_AT, 207126_X_AT, 232560_AT, 202201_AT, 206094_X_AT, 208596_S_AT	158	33	5085	3.90104	0.999995	0.641239	63.0573
UP_SEQ_FEATURE	region of interest:Connecting peptide	4	0.750469	0.0816574	221875_X_AT, 208729_X_AT, 211911_X_AT, 214459_X_AT, 211799_X_AT, 208812_X_AT, 221978_AT, 211529_X_AT, 211668_S_AT	515	38	19113	3.90659	1	0.996595	75.9859
SP_PIR_KEYWORDS	allosteric enzyme	4	0.750469	0.0866696	226929_AT, 1553972_A_AT, 239035_AT, 227088_AT, 235626_AT	518	39	19235	3.80853	1	0.518984	72.2987
INTERPRO	IPR013763:Cyclin-related	4	0.750469	0.0886507	200953_S_AT, 202769_AT, 226466_S_AT, 212331_AT, 202770_S_AT	478	37	16659	3.76773	1	0.975796	76.5778
SMART	SM00385:CYCLIN	4	0.750469	0.0899612	200953_S_AT, 202769_AT, 226466_S_AT, 212331_AT, 202770_S_AT	243	40	9079	3.73621	1	0.789802	68.7543
UP_SEQ_FEATURE	domain:Ig-like C1-type	4	0.750469	0.0920287	221875_X_AT, 208729_X_AT, 211911_X_AT, 214459_X_AT, 211799_X_AT, 208812_X_AT, 221978_AT, 211529_X_AT, 218746_AT	515	40	19113	3.71126	1	0.997935	80.1453
GOTERM_BP_FAT	GO:0046148~pigment biosynthetic process	4	0.750469	0.0929432	208881_X_AT, 222074_AT, 204615_X_AT, 232560_AT, 205565_S_AT	376	39	13528	3.69013	1	0.844994	81.4253
GOTERM_BP_FAT	GO:0006769~nicotinamide metabolic process	4	0.750469	0.0985158	204385_AT, 1555037_A_AT, 224812_AT, 202275_AT, 210663_S_AT, 217388_S_AT, 201193_AT	376	40	13528	3.59787	1	0.859687	83.2992
GOTERM_BP_FAT	GO:0046496~nicotinamide nucleotide metabolic process	4	0.750469	0.0985158	204385_AT, 1555037_A_AT, 224812_AT, 202275_AT, 210663_S_AT, 217388_S_AT, 201193_AT	376	40	13528	3.59787	1	0.859687	83.2992
GENETIC_ASSOCIATION_DB_DISEASE	severe acute respiratory syndrome	3	0.562852	0.00425659	202869_AT, 205552_S_AT, 204655_AT, 1405_I_AT, 1555759_A_AT, 202086_AT	117	3	3028	25.8803	0.955764	0.955764	6.26533
GOTERM_MF_FAT	GO:0047115~trans-1,2-dihydrobenzene-1,2-diol dehydrogenase activity	3	0.562852	0.00485392	216594_X_AT, 209160_AT, 209699_X_AT, 204151_X_AT, 211653_X_AT	378	4	12983	25.7599	0.954265	0.265443	6.98462
PIR_SUPERFAMILY	PIRSF001155:complement-activating serine proteases C1r/C1s/MASP	3	0.562852	0.00568594	208747_S_AT, 218983_AT, 212067_S_AT, 1555229_A_AT	234	4	7396	23.7051	0.787962	0.787962	7.2311
GOTERM_BP_FAT	GO:0048247~lymphocyte chemotaxis	3	0.562852	0.0146751	208607_S_AT, 204655_AT, 1405_I_AT, 1555759_A_AT, 216598_S_AT	376	7	13528	15.4195	1	0.561633	22.5174
SP_PIR_KEYWORDS	TPQ	3	0.562852	0.0181328	203559_S_AT, 202997_S_AT, 227145_AT, 202998_S_AT	518	8	19235	13.925	0.999704	0.268381	22.8264
SP_PIR_KEYWORDS	Isoprene biosynthesis	3	0.562852	0.0181328	208881_X_AT, 204615_X_AT, 201275_AT, 208647_AT, 210950_S_AT	518	8	19235	13.925	0.999704	0.268381	22.8264
GOTERM_BP_FAT	GO:0001573~ganglioside metabolic process	3	0.562852	0.0192112	218161_S_AT, 1555385_AT, 226189_AT	376	8	13528	13.492	1	0.597456	28.4478
GOTERM_BP_FAT	GO:0016540~protein autoprocessing	3	0.562852	0.0192112	227759_AT, 205565_S_AT, 204733_AT	376	8	13528	13.492	1	0.597456	28.4478
SMART	SM00348:IRF	3	0.562852	0.0225112	203882_AT, 208436_S_AT, 203275_AT	243	9	9079	12.454	0.984138	0.874057	24.4947
UP_SEQ_FEATURE	region of interest:Alpha-3	3	0.562852	0.0229262	221875_X_AT, 208729_X_AT, 211911_X_AT, 214459_X_AT, 211799_X_AT, 208812_X_AT, 221978_AT, 211529_X_AT	515	9	19113	12.3709	1	0.983849	32.1859
UP_SEQ_FEATURE	DNA-binding region:Tryptophan pentad repeat	3	0.562852	0.0229262	203882_AT, 208436_S_AT, 203275_AT	515	9	19113	12.3709	1	0.983849	32.1859
UP_SEQ_FEATURE	short sequence motif:Histidine box-3	3	0.562852	0.0229262	211423_S_AT, 200831_S_AT, 209146_AT, 200832_S_AT	515	9	19113	12.3709	1	0.983849	32.1859
UP_SEQ_FEATURE	short sequence motif:Histidine box-2	3	0.562852	0.0229262	211423_S_AT, 200831_S_AT, 209146_AT, 200832_S_AT	515	9	19113	12.3709	1	0.983849	32.1859
UP_SEQ_FEATURE	short sequence motif:Histidine box-1	3	0.562852	0.0229262	211423_S_AT, 200831_S_AT, 209146_AT, 200832_S_AT	515	9	19113	12.3709	1	0.983849	32.1859
INTERPRO	IPR019817:Interferon regulatory factor, conserved site	3	0.562852	0.0257767	203882_AT, 208436_S_AT, 203275_AT	478	9	16659	11.6172	1	0.967925	33.5243
INTERPRO	IPR001346:Interferon regulatory factor	3	0.562852	0.0257767	203882_AT, 208436_S_AT, 203275_AT	478	9	16659	11.6172	1	0.967925	33.5243
GOTERM_MF_FAT	GO:0016840~carbon-nitrogen lyase activity	3	0.562852	0.0264501	202336_S_AT, 222844_S_AT, 219205_AT, 202144_S_AT	378	9	12983	11.4489	1	0.702975	32.8938
SP_PIR_KEYWORDS	mhc i	3	0.562852	0.0281259	221875_X_AT, 208729_X_AT, 211911_X_AT, 214459_X_AT, 211799_X_AT, 208812_X_AT, 221978_AT, 211529_X_AT	518	10	19235	11.14	0.999997	0.353892	33.2332
UP_SEQ_FEATURE	active site:Phosphoserine intermediate	3	0.562852	0.0281541	203058_S_AT, 203060_S_AT, 204664_AT, 210431_AT	515	10	19113	11.1338	1	0.984337	38.0127
GOTERM_BP_FAT	GO:0046685~response to arsenic	3	0.562852	0.0297671	222047_S_AT, 232560_AT, 202284_S_AT	376	10	13528	10.7936	1	0.684956	40.6356
PIR_SUPERFAMILY	PIRSF001990:class I histocompatibility antigen	3	0.562852	0.0307415	221875_X_AT, 208729_X_AT, 211911_X_AT, 214459_X_AT, 211799_X_AT, 208812_X_AT, 221978_AT, 211529_X_AT	234	9	7396	10.5356	0.999795	0.985685	33.7018
SP_PIR_KEYWORDS	endonexin fold	3	0.562852	0.0337735	200982_S_AT, 201302_AT, 228727_AT, 201301_S_AT	518	11	19235	10.1272	1	0.361519	38.5218
COG_ONTOLOGY	Coenzyme metabolism	3	0.562852	0.0340793	232560_AT, 224522_S_AT, 218953_S_AT	54	11	1950	9.84848	0.482526	0.482526	22.8839
GOTERM_CC_FAT	GO:0000307~cyclin-dependent protein kinase holoenzyme complex	3	0.562852	0.0351092	200953_S_AT, 202284_S_AT, 224847_AT	352	11	12782	9.90341	0.99999	0.559337	38.2776
GOTERM_BP_FAT	GO:0009070~serine family amino acid biosynthetic process	3	0.562852	0.0357256	1553972_A_AT, 222844_S_AT, 217127_AT, 219205_AT	376	11	13528	9.81238	1	0.702125	46.6224
INTERPRO	IPR007593:Interferon-induced transmembrane protein	3	0.562852	0.0379246	201601_X_AT, 201315_X_AT, 230054_AT, 214022_S_AT	478	11	16659	9.50494	1	0.971694	45.3669
GOTERM_BP_FAT	GO:0002675~positive regulation of acute inflammatory response	3	0.562852	0.042099	204655_AT, 1405_I_AT, 217767_AT, 1555759_A_AT, 1554008_AT	376	12	13528	8.99468	1	0.728965	52.3941
GOTERM_MF_FAT	GO:0004622~lysophospholipase activity	3	0.562852	0.0457963	203718_AT, 225102_AT, 223309_X_AT	378	12	12983	8.58664	1	0.808171	50.2209
SMART	SM00335:ANX	3	0.562852	0.0521541	200982_S_AT, 201302_AT, 228727_AT, 201301_S_AT	243	14	9079	8.00617	0.999942	0.80304	48.3657
SP_PIR_KEYWORDS	annexin	3	0.562852	0.053006	200982_S_AT, 201302_AT, 228727_AT, 201301_S_AT	518	14	19235	7.95712	1	0.437715	53.7531
SP_PIR_KEYWORDS	carbon-carbon lyase	3	0.562852	0.053006	202022_AT, 222074_AT, 205822_S_AT	518	14	19235	7.95712	1	0.437715	53.7531
UP_SEQ_FEATURE	repeat:Annexin 4	3	0.562852	0.0530571	200982_S_AT, 201302_AT, 228727_AT, 201301_S_AT	515	14	19113	7.9527	1	0.987273	59.8662
UP_SEQ_FEATURE	repeat:Annexin 2	3	0.562852	0.0530571	200982_S_AT, 201302_AT, 228727_AT, 201301_S_AT	515	14	19113	7.9527	1	0.987273	59.8662
UP_SEQ_FEATURE	repeat:Annexin 3	3	0.562852	0.0530571	200982_S_AT, 201302_AT, 228727_AT, 201301_S_AT	515	14	19113	7.9527	1	0.987273	59.8662
UP_SEQ_FEATURE	repeat:Annexin 1	3	0.562852	0.0530571	200982_S_AT, 201302_AT, 228727_AT, 201301_S_AT	515	14	19113	7.9527	1	0.987273	59.8662
GENETIC_ASSOCIATION_DB_DISEASE	spondyloarthropathies	3	0.562852	0.0535512	208729_X_AT, 211911_X_AT, 214459_X_AT, 211799_X_AT, 208812_X_AT, 204279_AT, 202581_AT	117	10	3028	7.7641	1	0.99968	56.605
KEGG_PATHWAY	hsa04710:Circadian rhythm	3	0.562852	0.0591201	221530_S_AT, 226858_AT, 201170_S_AT	158	13	5085	7.42697	0.999871	0.591725	51.5762
INTERPRO	IPR018252:Annexin repeat, conserved site	3	0.562852	0.0593202	200982_S_AT, 201302_AT, 228727_AT, 201301_S_AT	478	14	16659	7.46817	1	0.963725	61.5645
INTERPRO	IPR001464:Annexin	3	0.562852	0.0593202	200982_S_AT, 201302_AT, 228727_AT, 201301_S_AT	478	14	16659	7.46817	1	0.963725	61.5645
INTERPRO	IPR018502:Annexin repeat	3	0.562852	0.0593202	200982_S_AT, 201302_AT, 228727_AT, 201301_S_AT	478	14	16659	7.46817	1	0.963725	61.5645
SP_PIR_KEYWORDS	calcium/phospholipid-binding	3	0.562852	0.0600988	200982_S_AT, 201302_AT, 228727_AT, 201301_S_AT	518	15	19235	7.42664	1	0.450225	58.4233
UP_SEQ_FEATURE	metal ion-binding site:Copper	3	0.562852	0.0601562	203559_S_AT, 202997_S_AT, 227145_AT, 202998_S_AT	515	15	19113	7.42252	1	0.991173	64.618
GOTERM_MF_FAT	GO:0004659~prenyltransferase activity	3	0.562852	0.0607959	206079_AT, 201275_AT, 208647_AT, 210950_S_AT	378	14	12983	7.35998	1	0.783348	60.6766
GOTERM_MF_FAT	GO:0016641~oxidoreductase activity, acting on the CH-NH2 group of donors, oxygen as acceptor	3	0.562852	0.0607959	203559_S_AT, 202997_S_AT, 227145_AT, 202998_S_AT	378	14	12983	7.35998	1	0.783348	60.6766
GENETIC_ASSOCIATION_DB_DISEASE	homocysteine	3	0.562852	0.0638476	226929_AT, 1553972_A_AT, 239035_AT, 217127_AT	117	11	3028	7.05828	1	0.999677	63.2394
SP_PIR_KEYWORDS	amyloidosis	3	0.562852	0.0674946	208607_S_AT, 200696_S_AT, 214040_S_AT, 1554008_AT	518	16	19235	6.96248	1	0.469111	62.8233
GOTERM_BP_FAT	GO:0006739~NADP metabolic process	3	0.562852	0.0712112	1555037_A_AT, 224812_AT, 202275_AT, 201193_AT	376	16	13528	6.74601	1	0.802513	72.0513
GOTERM_BP_FAT	GO:0007009~plasma membrane organization	3	0.562852	0.0712112	218901_AT, 205613_AT, 229053_AT, 202430_S_AT	376	16	13528	6.74601	1	0.802513	72.0513
GOTERM_BP_FAT	GO:0035195~gene silencing by miRNA	3	0.562852	0.079271	222047_S_AT, 213310_AT, 223849_S_AT	376	17	13528	6.34919	1	0.815068	75.954
GOTERM_BP_FAT	GO:0006783~heme biosynthetic process	3	0.562852	0.079271	222074_AT, 232560_AT, 205565_S_AT	376	17	13528	6.34919	1	0.815068	75.954
SP_PIR_KEYWORDS	blocked carboxyl end	3	0.562852	0.0831109	1553994_AT, 204664_AT, 210431_AT	518	18	19235	6.18887	1	0.516591	70.7305
BBID	26.cyclin-CDK_complexes	3	0.562852	0.0848653	202284_S_AT, 224847_AT, 236313_AT	13	15	358	5.50769	0.869936	0.869936	50.4873
GOTERM_MF_FAT	GO:0032393~MHC class I receptor activity	3	0.562852	0.085872	221875_X_AT, 208729_X_AT, 211911_X_AT, 214459_X_AT, 211799_X_AT, 208812_X_AT, 221978_AT, 211529_X_AT	378	17	12983	6.06116	1	0.831169	73.7119
BIOCARTA	h_classicPathway:Classical Complement Pathway	3	0.562852	0.0890036	208747_S_AT, 217767_AT, 212067_S_AT, 1555229_A_AT	62	12	1437	5.79435	0.999918	0.956643	64.5334
SMART	SM00568:GRAM	3	0.562852	0.0899155	225344_AT, 208763_S_AT, 209117_AT	243	19	9079	5.89929	1	0.819994	68.7349
SP_PIR_KEYWORDS	palmoplantar keratoderma	3	0.562852	0.0912913	205157_S_AT, 209125_AT, 212236_X_AT, 223278_AT	518	19	19235	5.86314	1	0.531869	74.2188
SP_PIR_KEYWORDS	placenta	3	0.562852	0.0912913	221649_S_AT, 202286_S_AT, 204664_AT	518	19	19235	5.86314	1	0.531869	74.2188
GOTERM_MF_FAT	GO:0016638~oxidoreductase activity, acting on the CH-NH2 group of donors	3	0.562852	0.0948143	203559_S_AT, 202997_S_AT, 227145_AT, 202998_S_AT	378	18	12983	5.72443	1	0.835436	77.2893
BBID	18.Cytokine_astocytes	3	0.562852	0.0951831	204655_AT, 1405_I_AT, 217767_AT, 1555759_A_AT, 216598_S_AT	13	16	358	5.16346	0.899793	0.683446	54.7431
KEGG_PATHWAY	hsa00053:Ascorbate and aldarate metabolism	3	0.562852	0.0951994	215125_S_AT, 204532_X_AT, 207126_X_AT, 203343_AT, 201425_AT, 206094_X_AT, 208596_S_AT	158	17	5085	5.67945	1	0.677364	69.5923
GENETIC_ASSOCIATION_DB_DISEASE	uveitis	3	0.562852	0.0981094	208729_X_AT, 211911_X_AT, 204655_AT, 1405_I_AT, 214459_X_AT, 1555759_A_AT, 211799_X_AT, 208812_X_AT, 216598_S_AT	117	14	3028	5.54579	1	0.999772	79.1181
GENETIC_ASSOCIATION_DB_DISEASE	atopic dermatitis	3	0.562852	0.0981094	221816_S_AT, 204655_AT, 1405_I_AT, 1555759_A_AT, 203275_AT	117	14	3028	5.54579	1	0.999772	79.1181
UP_SEQ_FEATURE	region of interest:Alpha-2	3	0.562852	0.0997857	221875_X_AT, 208729_X_AT, 211911_X_AT, 214459_X_AT, 211799_X_AT, 208812_X_AT, 221978_AT, 211529_X_AT	515	20	19113	5.56689	1	0.997548	82.8026
UP_SEQ_FEATURE	region of interest:Alpha-1	3	0.562852	0.0997857	221875_X_AT, 208729_X_AT, 211911_X_AT, 214459_X_AT, 211799_X_AT, 208812_X_AT, 221978_AT, 211529_X_AT	515	20	19113	5.56689	1	0.997548	82.8026
OMIM_DISEASE	Genome-wide association study targeting hIV1 viral setpoint.	2	0.375235	0.0500323	206082_AT, 208729_X_AT, 211911_X_AT, 214459_X_AT, 211799_X_AT, 208812_X_AT	94	2	3671	39.0532	0.999953	0.999953	47.2774
OMIM_DISEASE	C1r/C1s deficiency, combined	2	0.375235	0.0500323	208747_S_AT, 212067_S_AT, 1555229_A_AT	94	2	3671	39.0532	0.999953	0.999953	47.2774
SP_PIR_KEYWORDS	glyoxylate bypass	2	0.375235	0.0530351	1555037_A_AT, 210046_S_AT, 201193_AT	518	2	19235	37.1332	1	0.430317	53.7732
SP_PIR_KEYWORDS	Cysteine biosynthesis	2	0.375235	0.0530351	1553972_A_AT, 217127_AT	518	2	19235	37.1332	1	0.430317	53.7732
GOTERM_BP_FAT	GO:0070813~hydrogen sulfide metabolic process	2	0.375235	0.0546741	1553972_A_AT, 217127_AT	376	2	13528	35.9787	1	0.761339	62.1013
GOTERM_BP_FAT	GO:0006097~glyoxylate cycle	2	0.375235	0.0546741	1555037_A_AT, 210046_S_AT, 201193_AT	376	2	13528	35.9787	1	0.761339	62.1013
GOTERM_BP_FAT	GO:0019344~cysteine biosynthetic process	2	0.375235	0.0546741	1553972_A_AT, 217127_AT	376	2	13528	35.9787	1	0.761339	62.1013
GOTERM_BP_FAT	GO:0070814~hydrogen sulfide biosynthetic process	2	0.375235	0.0546741	1553972_A_AT, 217127_AT	376	2	13528	35.9787	1	0.761339	62.1013
GOTERM_BP_FAT	GO:0035279~gene silencing by miRNA, mRNA cleavage	2	0.375235	0.0546741	213310_AT, 223849_S_AT	376	2	13528	35.9787	1	0.761339	62.1013
INTERPRO	IPR001915:Peptidase M48, Ste24p	2	0.375235	0.0564482	202939_AT, 226019_AT	478	2	16659	34.8515	1	0.98377	59.688
INTERPRO	IPR004840:Amino acid permease, conserved site	2	0.375235	0.0564482	203578_S_AT, 204588_S_AT	478	2	16659	34.8515	1	0.98377	59.688
INTERPRO	IPR004790:Isocitrate dehydrogenase NADP-dependent, eukaryotic	2	0.375235	0.0564482	1555037_A_AT, 210046_S_AT, 201193_AT	478	2	16659	34.8515	1	0.98377	59.688
GOTERM_MF_FAT	GO:0047718~indanol dehydrogenase activity	2	0.375235	0.0572349	216594_X_AT, 209160_AT, 204151_X_AT	378	2	12983	34.3466	1	0.803018	58.3986
GOTERM_MF_FAT	GO:0047026~3-alpha-hydroxysteroid dehydrogenase (A-specific) activity	2	0.375235	0.0572349	209160_AT, 209699_X_AT, 211653_X_AT	378	2	12983	34.3466	1	0.803018	58.3986
GOTERM_MF_FAT	GO:0004450~isocitrate dehydrogenase (NADP+) activity	2	0.375235	0.0572349	1555037_A_AT, 210046_S_AT, 201193_AT	378	2	12983	34.3466	1	0.803018	58.3986
PIR_SUPERFAMILY	PIRSF027808:PIRSF027808	2	0.375235	0.0620187	221530_S_AT, 201170_S_AT	234	2	7396	31.6068	1	0.987141	56.9487
PIR_SUPERFAMILY	PIRSF000108:isocitrate dehydrogenase (NADP)	2	0.375235	0.0620187	1555037_A_AT, 210046_S_AT, 201193_AT	234	2	7396	31.6068	1	0.987141	56.9487
PIR_SUPERFAMILY	PIRSF000108:IDH_NADP	2	0.375235	0.0620187	1555037_A_AT, 210046_S_AT, 201193_AT	234	2	7396	31.6068	1	0.987141	56.9487
GENETIC_ASSOCIATION_DB_DISEASE	Behcet's disease; retinal vasculitis; uveitis	2	0.375235	0.0751628	204655_AT, 1405_I_AT, 1555759_A_AT, 216598_S_AT	117	2	3028	25.8803	1	0.999714	69.4314
UP_SEQ_FEATURE	region of interest:Pyridoxal phosphate binding	2	0.375235	0.0785319	204385_AT, 1553972_A_AT, 210663_S_AT, 217388_S_AT	515	3	19113	24.7417	1	0.996631	74.5799
UP_SEQ_FEATURE	binding site:Pyridoxal phosphate	2	0.375235	0.0785319	204385_AT, 1553972_A_AT, 210663_S_AT, 217388_S_AT	515	3	19113	24.7417	1	0.996631	74.5799
GOTERM_BP_FAT	GO:0014012~axon regeneration in the peripheral nervous system	2	0.375235	0.0808827	212233_AT, 221805_AT	376	3	13528	23.9858	1	0.818532	76.6701
GOTERM_BP_FAT	GO:0050667~homocysteine metabolic process	2	0.375235	0.0808827	1553972_A_AT, 217127_AT	376	3	13528	23.9858	1	0.818532	76.6701
GOTERM_BP_FAT	GO:0046502~uroporphyrinogen III metabolic process	2	0.375235	0.0808827	222074_AT, 232560_AT	376	3	13528	23.9858	1	0.818532	76.6701
GOTERM_MF_FAT	GO:0016842~amidine-lyase activity	2	0.375235	0.0846151	202336_S_AT, 202144_S_AT	378	3	12983	22.8977	1	0.836041	73.1688
